# Supplementary material for: Comparison of intravenous, topical or combined routes of tranexamic acid administration in patients undergoing total knee and hip arthroplasty: a meta-analysis of randomised controlled trials
Source: PubMed Central journal article supplement — BMJ Open. 2019 Jan 28;9(1):e024350. doi: 10.1136/bmjopen-2018-024350 (PMC6352808; doi:10.1136/bmjopen-2018-024350), 2019-01-28
Supplement: bmjopen-2018-024350.draft_revisions.pdf [file bmjopen-2018-024350.draft_revisions.pdf]

# BMJ Open

BMJ Open is committed to open peer review. As part of this commitment we make the peer review history of every article we publish publicly available.

When an article is published we post the peer reviewers' comments and the authors' responses online. We also post the versions of the paper that were used during peer review. These are the versions that the peer review comments apply to.

The versions of the paper that follow are the versions that were submitted during the peer review process. They are not the versions of record or the final published versions. They should not be cited or distributed as the published version of this manuscript.

BMJ Open is an open access journal and the full, final, typeset and author-corrected version of record of the manuscript is available on our site with no access controls, subscription charges or pay-per-view fees (<http://bmjopen.bmj.com>).

If you have any questions on BMJ Open's open peer review process please email [info.bmjopen@bmj.com](mailto:info.bmjopen@bmj.com)

# BMJ Open

## Comparison of the different routes of tranexamic acid administration in patients undergoing total knee and hip arthroplasty: A PRISMA-compliant meta-analysis of randomized controlled trials

|                               |                                                                                                                                                                          |
|-------------------------------|--------------------------------------------------------------------------------------------------------------------------------------------------------------------------|
| Journal:                      | <i>BMJ Open</i>                                                                                                                                                          |
| Manuscript ID                 | bmjopen-2018-024350                                                                                                                                                      |
| Article Type:                 | Research                                                                                                                                                                 |
| Date Submitted by the Author: | 22-May-2018                                                                                                                                                              |
| Complete List of Authors:     | Sun, Qi<br>Li, Jinyu<br>Chen, Jiang<br>Zheng, Chenying<br>Liu, Chuyin<br>Jia, Yusong; Beijing University of Chinese Medicine Affiliated Dongzhimen Hospital, Orthopedics |
| Keywords:                     | tranexamic acid, total knee arthroplasty, total hip arthroplasty, IV, topical, meta-analysis                                                                             |
|                               |                                                                                                                                                                          |

SCHOLARONE™  
Manuscripts

1  
2 **Comparison of the different routes of tranexamic acid administration in patients**  
3 **undergoing total knee and hip arthroplasty: A PRISMA-compliant meta-**  
4 **analysis of randomized controlled trials**  
5  
6

7  
8 Qi Sun<sup>1¶</sup>, Jinyu Li<sup>1¶</sup>, Jiang Chen<sup>1</sup>, Chenying Zheng<sup>1</sup>, Chuyin Liu<sup>1</sup>, Yusong Jia<sup>1\*</sup>  
9

10  
11  
12  
13  
14 <sup>1</sup>Department of Orthopedics, Dongzhimen Hospital, Beijing University of Chinese Medicine,  
15  
16 Beijing, China.  
17

18  
19  
20  
21  
22 \*Corresponding author E-mail: [spioneer2001@sina.com](mailto:spioneer2001@sina.com)  
23  
24  
25  
26  
27

28 Qi Sun: [sunqi2001@sina.com](mailto:sunqi2001@sina.com)  
29

30  
31 Jinyu Li: [lijinyu84@126.com](mailto:lijinyu84@126.com)  
32

33  
34 Jiang Chen: [964402173@qq.com](mailto:964402173@qq.com)  
35

36  
37 Chenying Zheng: [zhengchenying99@sina.com](mailto:zhengchenying99@sina.com)  
38

39  
40 Chuyin Liu: [1827193473@qq.com](mailto:1827193473@qq.com)  
41  
42  
43  
44

45 <sup>¶</sup>These authors contributed equally to this work.  
46  
47  
48  
49

50 **Running title:** TXA in treatment of TKA or THA  
51  
52  
53  
54  
55  
56  
57  
58  
59  
60

## Abbreviations, Nomenclature and Symbols

TXA: tranexamic acid; TKA: total knee arthroplasty; THA: total hip arthroplasty; RCT: randomized controlled trials; RR: relative risk; WMD: weighted mean difference; CI: confidence interval; IV: intravenous; Hb: hemoglobin; LOS: length of stay; VTE: venous thromboembolism; TJA: total joint arthroplasty; PE: pulmonary embolism; DVT: deep vein thrombosis; LMWH: low molecular weight heparin.

## Abstract

**Objective:** This study aimed to investigate the effects of tranexamic acid (TXA) on blood loss and transfusion requirements in patients undergoing total knee and hip arthroplasty (TKA and THA).

**Design:** This was a meta-analysis of randomized controlled trials (RCTs) in which the weighted mean difference (WMD) and the relative risk (RR) were used for data synthesis employed the random-effects model.

**Setting:** We searched the PubMed, Embase, and Cochrane CENTRAL databases for randomized controlled trials (RCTs) that compared different routes of TXA administration.

**Participants:** patients undergoing TKA or THA

**Interventions:** intravenous or topical TXA.

**Results:** Twenty-six RCTs were selected, and the IV route did not differ substantially from the topical route with regard to total blood loss (WMD = 30.92,  $P = 0.31$ ), drain blood loss (WMD = -34.53,  $P = 0.50$ ), postoperative hemoglobin (Hb) levels (WMD = -0.01,  $P = 0.96$ ), Hb decline (WMD = -0.39,  $P = 0.08$ ), length of hospital stay (WMD = 0.15,  $P = 0.38$ ), transfusion rate (RR = 1.08,  $P = 0.75$ ), and venous thromboembolism (VTE) occurrence (RR = 1.89,  $P = 0.15$ ). Compared to the combined-delivery group, the single route group had significantly increased total blood loss (WMD = 198.07,  $P < 0.05$ ), greater Hb decline (WMD = 0.56,  $P < 0.05$ ), and higher transfusion rates (RR = 2.51,  $P < 0.05$ ). However, the two groups did not differ significantly with regard to drain blood loss, postoperative Hb levels, and VTE events. The IV and topical routes had comparable efficacy and safety profiles.

1  
2  
3  
4  
5  
6  
7  
8  
9  
10  
11  
12  
13  
14  
15  
16  
17  
18  
19  
20  
21  
22  
23  
24  
25  
26  
27  
28  
29  
30  
31  
32  
33  
34  
35  
36  
37  
38  
39  
40  
41  
42  
43  
44  
45  
46  
47  
48  
49  
50  
51  
52  
53  
54  
55  
56  
57  
58  
59  
60

**Conclusions:** The combined use of IV and topical TXA appeared to be relatively more effective at controlling bleeding without increasing the risk of VTE.

For peer review only

## Strengths and limitations of this study

1. All of included studies with randomized controlled designed, and the uncontrolled biases could avoid.
2. The combination of topical and systemic administration of TXA was also calculated.
3. The heterogeneity was explored by sensitivity, subgroup, and meta-regression analyses.
4. The number of participants in most of the included studies was small, and the prevalence of VTE was low following joint replacement.
5. Only a small number of trials evaluated the combined-delivery group, which precluded sufficient exploration of heterogeneity through subgroup or meta-regression analysis

**Keywords:** tranexamic acid; total knee arthroplasty; total hip arthroplasty; IV; topical; meta-analysis

## Introduction

Tranexamic acid (TXA) is a synthetic derivative of the amino acid lysine, which inhibits the process of fibrinolysis by blocking the lysine binding site on plasminogen.<sup>1</sup> Currently, it is one of the most commonly used hemostatic drugs. TXA is capable of reducing blood loss in surgical patients by approximately 34%.<sup>2,3</sup> TXA has effectively reduced blood loss and the transfusion rate in various surgical settings, including in traumatic hemorrhage,<sup>4</sup> cesarean section,<sup>5</sup> endoscopic sinus surgery,<sup>6</sup> cardiac surgery,<sup>7</sup> and arthroplasty.<sup>8</sup>

Total knee arthroplasty (TKA) and total hip arthroplasty (THA) are reliable surgical procedures for patients suffering from moderate to severe degenerative joint diseases. Total joint arthroplasty (TJA) has proved effective in relieving pain, restoring physical function, and in improving health-related quality of life.<sup>9</sup> By 2030, the demand for primary THA is estimated to increase to 572,000, and that for primary TKA is estimated to grow to 3.48 million procedures.<sup>10</sup> Despite substantial advances in surgical and anesthetic techniques, TKA and THA are still associated with a large amount of perioperative blood loss.<sup>11</sup> Specifically, intraoperative blood loss during either of these procedures is generally between 500 mL to 1,500 mL. Additionally, patients may experience a postoperative drop in hemoglobin between 1 and 3 g/dL.<sup>12</sup> Up to 50% patients undergoing TJA inevitably experience postoperative anemia.<sup>11</sup>

The role of TXA during arthroplasty has been a hot but controversial issue for the past two decades. Abundant previous trials or meta-analyses have mainly focused on comparing TXA and normal saline, proving that both intravenous (IV) and topical TXA were associated with significantly reduced perioperative blood loss and blood transfusion requirements.<sup>13-16</sup> In contrast, few studies have directly compared different TXA administration routes.<sup>17</sup> In most clinical scenarios, TXA is

1 well-tolerated. However, the potential for thromboembolic events (deep vein thromboembolism or  
2 pulmonary embolism) after its use represents TXA's Achilles' heel.<sup>1</sup> Compared with the systemic  
3 method, topical application of TXA during arthroplasty may be a safer route that may reduce  
4 postoperative hemorrhage without contributing to hypercoagulation. Notably, the topical route has  
5 been shown to be a cost-effective and convenient route for TXA administration during dental,  
6 cardiac, and spinal surgeries.<sup>18</sup> Several relevant trials have been published recently. Thus, we  
7 compiled this systematic review and meta-analysis to compare the efficacy and safety of topical and  
8 IV TXA use during TKA and TXA. In addition, the combination of topical and systemic  
9 administration of TXA was also evaluated.

## 19 **Methods**

### 21 **Search strategy**

23 This review was conducted according to the Preferred Reporting Items for Systematic Reviews and  
24 Meta-Analysis Statement issued in 2009.<sup>19</sup> Ethics approval was not necessary for this study, as only  
25 de-identified pooled data from individual studies was analyzed. We searched PubMed, Embase, and  
26 Cochrane CENTRAL for relevant studies from the time of these databases' inception to April, 2018.  
27 The following groups of keywords and medical terms were used for the literature search:  
28 "tranexamic acid" AND ("total knee arthroplasty" OR "total knee replacement" OR "total hip  
29 arthroplasty" OR "total hip replacement" OR arthroplasty) AND (random\* OR prospective\* OR  
30 trial\*). The language was restricted to English. We also conducted an additional search by screening  
31 the references of eligible studies.

### 39 **Selection of studies**

41 Studies were pooled for meta-analysis if they met the following criteria: (1) randomized controlled  
42 trials (RCTs); (2) comparing IV TXA with topical TXA, or considering their combination, in total  
43 knee/hip arthroplasty; (3) presenting the relevant outcomes, including intraoperative blood loss,  
44 total blood loss, transfusion rate, low postoperative hemoglobin (Hb) level, postoperative Hb  
45 decline, significant length of hospital stay (LOS), and/or the occurrence of venous  
46 thromboembolism (VTE). VTE may present as pulmonary embolism (PE) or deep vein thrombosis  
47 (DVT).

### 54 **Data collection and quality assessment**



Two reviewers independently evaluated the eligibility of the collected studies and extracted their data. Any discrepancy was resolved via a consensus meeting. The full text of the eligible studies was reviewed, and information was extracted into an electronic database, including author, year of publication, design, region, patient characteristics (e.g., age, gender, surgery type), TXA regimen, transfusion criteria, tourniquet use, thromboembolism prophylaxis, and the outcomes. For the quality assessment of RCTs, the Jadad score was employed,<sup>20</sup> which assigned a score of 0 to 5 according to the items of randomization, blinding, and withdrawals reported during the study period.

### Statistical analysis

All meta-analyses were conducted using Stata 12.0 (StataCorp LLC, College Station, TX, USA). For dichotomous outcomes, we employed relative risk (RR) and 95% confidence intervals (CI) as estimates. For continuous data, we used weighted mean differences (WMD) and 95% CIs as estimates. We converted median to mean following Hozo's method.<sup>21</sup> The random-effects model was used for data processing. Statistical heterogeneity among the studies was assessed by using the Cochran Q statistic, and was quantified according to  $I^2$  statistics. We considered low, moderate, and high heterogeneity as  $I^2$  values of  $\leq 25\%$ , 25–75%, and  $\geq 75\%$ , respectively.<sup>22</sup> Sensitivity analysis was performed by removing one trial at a time to determine its influence on the overall result. Subgroup analysis was further performed according to the following variables: surgery (THA or TKA), region (Asia, North America, or Europe), IV dose ( $\geq 2$  g or  $< 2$  g), topical dose ( $\geq 2$  g or  $< 2$  g), and transfusion protocol (strict or loose). We categorized the TXA dose of 30 mg/kg into the subgroup of  $\geq 2$  g. We considered a strict transfusion protocol for the threshold of Hb  $< 8$  g/dL. When more than 10 studies were available for certain outcomes, meta-regression was performed to examine the impact of sample size. A funnel plot was constructed to visually evaluate the publication bias. Egger's and Begg's tests were used for quantitative assessment of publication bias.<sup>23,24</sup>  $P < 0.05$  was considered statistically significant.

### Results

Fig. 1 shows the flow diagram of the study selection process. After step-by-step exclusion, 26 RCTs were finally included. One trial had three comparison arms of IV TXA, topical TXA, and their combination.<sup>25</sup> Tables 1 and 2 show the main features of the trials. We identified 20 RCTs comparing IV TXA with topical TXA, totaling 1,912 participants (Table 1).<sup>25-44</sup> Fifteen trials used TXA in TKA procedures, and five trials used TXA in THA procedures. For TKA studies, only one did not use a tourniquet during surgery.<sup>42</sup> Ten trials were conducted in Asia, seven in Europe, and

1 three in the United States. The mean patient age ranged from 44 to 73 years. Seventeen trials  
2 presented a thromboprophylaxis protocol, with low molecular weight heparin used most frequently.  
3 Seven RCTs compared single-route administration (IV or intra-articular) with a combination of IV  
4 and topical routes<sup>25,45-50</sup> (Table 2), with a total of 877 patients. Most of them (5/7) were conducted  
5 in the Chinese population. Four studies were on TKA, and three studies were on THA. For the arm  
6 of single route, five trials used the IV route, one used the topical route, and one used both. All the  
7 studies implemented a thromboprophylaxis protocol. With regard to TKA studies, only Nielsen et al.  
8 did not use an intraoperative tourniquet.<sup>48</sup> The quality assessment of the selected trials using the  
9 Jadad score is shown in Supplemental Table 1, and the total score of the included trials is presented  
10 in Tables 1 and 2. The total score ranged from 1 to 5, with a mean score of 3.7. The items related to  
11 blinding was least satisfied.

## 12 **IV versus topical route**

### 13 ***Blood loss***

14 Fourteen studies were available. Compared with the topical route, IV administration of TXA did not  
15 lead to significantly increased total blood loss (WMD = 30.92, 95% CI -28.40-90.25, P = 0.31; I<sup>2</sup> =  
16 87.0%, P < 0.05). This effect was not substantially different for either TKA (WMD = 52.69, 95% CI  
17 -18.58-123.97, P = 0.15) or THA (WMD = -31.03, 95% CI -156.16-94.10, P = 0.63). (Fig. 2).

18 Subgroup analysis showed that neither region (Asia, Europe, or USA), IV dose ( $\geq 2$  g or  $< 2$  g) nor  
19 topical dose ( $\geq 2$  g or  $< 2$  g) markedly affected the overall effect (all P > 0.05). We did not identify  
20 any study that significantly changed the overall effect in the sensitivity analysis. Meta-regression  
21 demonstrated that sample size did not account for the heterogeneity (P = 0.20). The funnel plot  
22 appeared to be symmetrical. No publication bias was revealed on using Egger's test (P = 0.37) or  
23 Begg's test (P = 0.27).

24 Eight studies presented the outcome of drain blood loss. No significant difference was shown for  
25 the IV route versus the topical route (WMD = -34.53, 95% CI -135.39-66.34, P = 0.50; I<sup>2</sup> = 97.2%,  
26 P < 0.05). No significant change in the overall effect was displayed for TKA (WMD = -38.28, 95%  
27 CI -146.29-69.73, P = 0.49) or THA (WMD = -7.50, 95% CI -95.00-80.00, P = 0.87).

### 28 ***Postoperative Hb***

29 By pooling data from 14 relevant studies, no significant difference was found between the IV and  
30 topical routes of TXA administration with respect to the postoperative Hb level (WMD = -0.01,  
31 95% CI -0.23-0.22, P = 0.96; I<sup>2</sup> = 80.5%, P < 0.05). The result remained insignificant for TKA

(WMD = -0.00, 95% CI -0.25-0.25, P = 0.99) and THA (WMD = -0.03, 95% CI -0.76-0.70, P = 0.94) (Fig. 3). When stratified according to region, IV dose, and topical dose, no significant data was displayed for any subgroup (all P > 0.05). Sensitivity analysis performed by excluding studies one by one did not detect any significant change. Meta-regression analysis did not reveal a significant role for sample size in explaining the heterogeneity (P = 0.27). The funnel plot was symmetrical, and no bias was shown on using Egger's test (P = 0.38) or Begg's test (P = 0.91).

Seven studies reported a decline in Hb levels after arthroplasty. The pooled data did not reveal a significant difference for the IV route versus the topical route (WMD = -0.39, 95% CI -0.82-0.04, P = 0.08; I<sup>2</sup> = 89.4%, P < 0.05). In subgroup analysis, two studies on THA showed that the IV route had a significantly lesser amount of Hb decline than the topical route (WMD = -0.49, 95% CI -0.70-0.28, P < 0.05). However, no statistical significance was revealed for the TKA procedure (WMD = -0.35, 95% CI -1.02-0.32, P = 0.31). When excluding the studies by Soni et al. or by Tzatzairis et al.,<sup>31,42</sup> however, the overall effect turned out to be significant (P < 0.05).

### ***Transfusion rate***

Seventeen studies were available with regard to having information on transfusion rate. The pooled results demonstrated that no significant difference regarding the transfusion rate for IV route versus topical route was present (RR = 1.08, 95% CI 0.78-1.50, P = 0.75). No heterogeneity was detected (I<sup>2</sup> = 0%, P = 0.63). In a separate analysis completed according to different arthroplasty procedures, the result was not substantially altered (TKA: RR = 1.25, 95% CI 0.80-1.96, P = 0.32; THA: RR = 0.80, 95% CI 0.46-1.37, P = 0.41) (Fig. 4). When stratified according to transfusion threshold (i.e., loose or strict), no significant result was shown for any subgroup (loose: RR = 1.13, P = 0.65; strict: RR = 1.00, P = 1.00). Similarly, we did not detect any substantially significant results for subgroups based on region, IV dose, or topical dose (all P > 0.05). Sensitivity analysis did not show that the inclusion of any individual study significantly changed the overall effect. The sample size was not the source of heterogeneity in meta-regression analysis (P = 0.36). The funnel plot was symmetrical. No publication bias was shown on using Egger's test (P = 0.69) or Begg's test (P = 1.00).

### ***Length of stay***

The length of stay (LOS) in the hospital was reported in seven studies. One study was excluded due to zero standard deviation.<sup>42</sup> The pooled results showed that the IV route and the topical route had similar LOS (WMD = 0.15, 95% CI -0.18-0.47, P = 0.38; I<sup>2</sup> = 90.1%, P < 0.05). No marked change was revealed for TKA (WMD = 0.27, 95% CI -0.01-0.54, P = 0.06) or THA (WMD = -0.05, 95% CI -0.42-0.32, P = 0.80).

## ***VTE events***

A total of 20 studies reported VTE events. However, 11 trials showed no VTE occurrence in any study group<sup>29-33,35-39,42</sup> and were thus excluded from meta-analysis. For the remaining nine trials, except for one study,<sup>27</sup> low molecular weight heparin was unanimously used for thromboprophylaxis. The aggregated data showed no significant difference for the IV versus topical route (RR = 1.89, 95% CI 0.79-4.55, P = 0.15). No heterogeneity was detected ( $I^2 = 0$ , P = 0.90). The pooled results remained non-significant for TKA (RR = 2.14, 95% CI 0.74-6.18, P = 0.16) and THA (RR = 1.45, 95% CI 0.30-6.93, P = 0.64) (Fig. 5). No single study played a substantial role in sensitivity analysis. Sample size was not the source of heterogeneity in meta-regression (P = 0.74).

## **Combined routes versus single route**

### ***Blood loss***

The pooled data showed that compared with the combined regimen, the single route had significant increased total blood loss (WMD = 198.07, 95% CI 88.46-307.67, P < 0.05;  $I^2 = 92.3%$ ). When stratified according to different procedures, the results remained significant for TKA (WMD = 168.34, 95% CI 85.44-251.25, P < 0.05;  $I^2 = 59.4%$ ) and THA (WMD = 210.36, 95% CI 13.34-407.39, P < 0.05;  $I^2 = 96.3%$ ) (Fig. 6). When stratified according to different routes, either IV route (WMD = 228.93, P < 0.05) or topical route (WMD = 108.80, P < 0.05) showed significantly increased total blood loss. Only two studies had data on drain blood loss,<sup>45,49</sup> and their pooled results showed no significant difference between single route and combined regimen (WMD = 109.51, 95% CI -34.73-253.74, P = 0.14;  $I^2 = 98.1%$ , P < 0.05).

### ***Hb level***

Three studies presented the postoperative Hb levels, including two on TKA<sup>46,48</sup> and one on THA.<sup>50</sup> No significant difference was revealed for single route in comparison with combined routes (WMD = -0.28, 95% CI -1.30-0.74, P = 0.59;  $I^2 = 89.6%$ , P < 0.05). Six studies presented the outcome of Hb decline following surgery. The pooled results revealed that the single route had a significantly greater magnitude of Hb decline than the combined method (WMD = 0.56, 95% CI 0.30-0.81, P < 0.05;  $I^2 = 85.2%$ , P < 0.05). The result remained significant for both studies on TKA (WMD = 0.44, P < 0.05), and for those on THA (WMD = 0.67, P < 0.05).

### ***Transfusion rate***

Seven studies were eligible, including four studies on TKA,<sup>45-48</sup> and three studies on THA.<sup>25,49,50</sup>

1 Xie et al. reported both the use of IV and topical during TXA.<sup>25</sup> The single route had a significantly  
2 higher rate of blood transfusion than the combined group (RR = 2.51, 95% CI 1.48-4.25, P < 0.05).  
3 No heterogeneity was shown ( $I^2 = 0$ ). This trend remained significant for studies on TKA (RR =  
4 0.09, P < 0.05) and THA (RR = 2.66, P < 0.05) (Fig. 7). When stratified according to the routes, IV  
5 route still showed a markedly higher transfusion rate than did the combination group (RR = 2.39,  
6 95% CI 1.38-4.11, P < 0.05). However, two studies that used the topical route did not show a  
7 significantly higher rate (RR = 5.45, 95% CI 0.64-46.42, P = 0.12).  
8  
9  
10  
11  
12

### 13 ***Length of stay***

14  
15  
16 Four studies were relevant in terms of for evaluating the length of hospital stay,<sup>25,45,48,49</sup> and Xie et  
17 al. presented on both IV and topical routes.<sup>25</sup> The length of stay did not differ significantly between  
18 the single route and combination regimen (WMD = 0.09, 95% CI -0.10-0.28, P = 0.36;  $I^2 = 45.8%$ ,  
19 P = 0.12). No significant change was detected for TKA or THA (both P > 0.05). For four studies on  
20 the IV route, the result remained non-significant (WMD = 0.14, P = 0.22).  
21  
22  
23  
24

### 25 ***VTE events***

26  
27 Six studies were eligible for consideration of VTE events.<sup>25,45-47,49,50</sup> One study showed zero events  
28 for both arms,<sup>46</sup> and one study presented both IV and topical routes.<sup>25</sup> The pooled data suggested  
29 that the risk of VTE events did not differ substantially between the single and combination routes  
30 (RR = 0.80, 95% CI 0.27-2.35, P = 0.68;  $I^2 = 0$ ). No statistical significance was shown between the  
31 different types of arthroplasty (TKA: RR = 2.98, P = 0.34; and THA: RR = 0.54, P = 0.32) (Fig. 8),  
32 or for different single-delivery routes (IV: RR = 0.98, P = 0.97; topical: RR = 0.20, P = 0.30).  
33  
34  
35  
36  
37  
38  
39  
40

### 41 **Discussion**

42  
43 TXA use represents one of the most tremendous advances in recent history for reducing blood loss  
44 during total joint replacement and for ensuring a fast postoperative recovery. To our knowledge, this  
45 is the most comprehensive meta-analysis of updated randomized trials investigating the efficacy  
46 and safety of IV versus topical TXA in total knee and hip arthroplasty. The role of a combined  
47 regimen using IV plus topical routes was firstly assessed by using the meta-analytic approach. We  
48 found that the IV and topical routes did not differ substantially for the outcomes of total blood loss,  
49 drain blood loss, postoperative Hb level, postoperative Hb fall, transfusion rate, and/or length of  
50 hospitalization. The incidence of VTE was low for both studied arms. The two routes appeared to  
51 be of comparable safety profiles for patients receiving arthroplasty. Except for two THA studies  
52  
53  
54  
55  
56  
57  
58  
59  
60

1 showing the IV route resulted in a lesser magnitude of Hb decline, the overall effect remained  
2 insignificant for the majority of subgroups stratified based on THA or TKA. When comparing the  
3 combination regimen with the single route, our meta-analysis demonstrated that the combination of  
4 IV and topical routes could significantly decrease the total blood loss and reduce transfusion  
5 requirements. A relatively lesser degree of Hb decline was revealed the combined-delivery regimen.  
6 The length of hospitalization was similar for both arms. Overall, VTE events occurred rarely for  
7 both routes, and no marked difference was revealed in the comparison between the combination and  
8 single route groups.  
9

10  
11  
12  
13  
14  
15 In terms of mechanisms, following IV administration, TXA widely distributes among the  
16 extracellular and intracellular compartments. It rapidly diffuses into the synovial fluid until its  
17 concentration in the synovial fluid reaches to that of the serum. The biological half-life is three  
18 hours in the joint fluid, and 90% of TXA is eliminated within 24 hours after administration.<sup>51</sup> For  
19 the intra-articular route, administration of TXA in this manner could provide a maximum local dose  
20 at the site where needed. Local administration of TXA inhibits fibrin dissolution and induces partial  
21 microvascular hemostasis.<sup>52</sup> Especially, the release of the tourniquet always causes increased  
22 fibrinolysis, which can be attenuated by topical TXA.<sup>53</sup> Compared with the IV route, the systemic  
23 absorption for local use is at a substantially lower level.<sup>54</sup> Additionally, the use of topical TXA  
24 could be safer than IV TXA in patients with renal impairment.<sup>34</sup>  
25  
26  
27  
28  
29  
30  
31

32 Several meta-analyses have been published on TXA use during arthroplasty. Both IV and intra-  
33 articular administration of TXA have been demonstrated to reduce blood loss without increased risk  
34 of thromboembolic complications, and the use of IV TXA is considerably more common.<sup>13,14,16,55-60</sup>  
35 However, most of these compared TXA with a placebo. We only identified two meta-analyses that  
36 did a head-to-head comparison between the topical and IV routes, including one on TKA,<sup>17</sup> and the  
37 other on THA.<sup>61</sup> Both of these analyses included only a very small number of studies. In addition,  
38 they had a methodological flaw, in that they included non-randomized or retrospective studies.  
39  
40  
41  
42  
43

44 Our meta-analysis has several apparent strengths: first and foremost, all of the included studies were  
45 RCTs. The number of included trials was also much larger in our meta-analysis than the numbers of  
46 included trials in other meta-analyses, which increased the statistical power. All relevant trials  
47 published during the past two years were analyzed. In addition, we first investigated the efficacy of  
48 the combination of topical and IV routes. Given the similar mechanism of TXA administration in  
49 both TKA and THA, both procedures were considered for this meta-analysis.  
50  
51  
52  
53

54 Several clinical variables may influence the efficacy of TXA. The optimal dose of TXA remained  
55  
56  
57  
58  
59  
60

1 controversial. When topically used, there was no difference in the efficacy of 1.5 g versus 3 g of  
2 TXA wash in reducing perioperative blood loss.<sup>62</sup> However, a meta-analysis of seven trials  
3 suggested that a higher dose (> 2 g), but not a low dose, was correlated with significantly reduced  
4 transfusion requirements<sup>15</sup> In our subgroups stratified according to high dose ( $\geq 2$  g) and low dose (<  
5 2 g), no marked difference was shown between them regarding most of the outcomes. In fact, the  
6 effect on blood loss reduction between the low-dose and high-dose TXA may be explained by the  
7 “tissue contact time”—namely, the time at which TXA is applied on the joint bed.<sup>63</sup> At least five  
8 minutes of contact time was allowed before TXA was suctioned from the wound to allow for the  
9 repair of the retinaculum.<sup>37</sup> Sa-Ngasoongsong et al. suggested that prolonging the contact time  
10 could enhance the effects of low-dose TXA.<sup>63</sup>

11 We were aware of several limitations with respect to this meta-analysis. The number of participants  
12 in most of the included studies was small. As the prevalence of VTE was low following joint  
13 replacement, trials with a larger sample size were further needed to increase the statistical power.  
14 Only a small number of trials evaluated the combined-delivery group, which precluded sufficient  
15 exploration of heterogeneity through subgroup or meta-regression analysis. Many included trials  
16 also had methodological deficits, such as the description of the randomization process, the blinded  
17 assessment, and/or the explanation of withdrawal and dropouts. Several studied outcomes have  
18 been criticized for their inaccuracy. For example, drains may not be suitable for the measurement of  
19 blood loss, as the hematocrit in the drain output declined over time, and drains may increase the  
20 blood loss. The existing literature provided variable and heterogeneous information with respect to  
21 the clinical features. For instance, the estimation of blood loss, the timing of Hb measurement, and  
22 the indications for blood transfusion were not standardized among the various trials. Several studies  
23 used tourniquet to facilitate the arthroplasty procedure, which may adversely impact the efficacy of  
24 intraoperative IV TXA.<sup>37</sup> A meta-analysis showed that the use of a tourniquet was associated with  
25 increased risk for vein thrombosis.<sup>64</sup> Intraoperative hypotension or hypertension may affect the  
26 amount of blood loss, whereas related information was unclear in most included trials. Additionally,  
27 the length of hospitalization may be further affected by the patients’ age, surgical experience, and/or  
28 infection complications. We speculated that these confounding factors were balanced between  
29 different comparison groups due to the randomized design. Not searching grey literature and  
30 articles in other languages might also have skewed the results. Finally, high heterogeneity was  
31 observed in places, which might limit the ability to make strong inferences.

## 32 **Conclusions**

1 Our meta-analysis showed that IV and topical TXA had comparable efficacy and safety profiles.  
2  
3 The combined delivery method using IV and topical TXA may be the most efficacious strategy that  
4  
5 can be used while remaining safe.  
6  
7  
8  
9  
10  
11  
12  
13  
14  
15  
16  
17  
18

### 19 **Acknowledgments**

#### 21 **Funding**

22 Not applicable.  
23  
24  
25  
26

#### 27 **Conflicts of interest statement**

28 Not declared.  
29  
30  
31  
32

#### 33 **Author contributions**

34 SQ and LJ contributed to conception and design. SQ, LJ, CJ, ZC, LC, and JY contributed to data acquisition or  
35  
36 analysis and interpretation of data. SQ and LJ were involved in drafting the manuscript or revising it critically for  
37  
38 important intellectual content. All authors have given final approval of the version to be published.  
39  
40  
41

#### 42 **Data sharing statement**

43 No additional data are available.  
44  
45  
46  
47  
48  
49  
50  
51  
52  
53  
54  
55  
56  
57  
58  
59  
60



1  
2  
3  
4  
5  
6  
7  
8  
9  
10  
11  
12  
13  
14  
15  
16  
17  
18  
19  
20  
21  
22  
23  
24  
25  
26  
27  
28  
29  
30  
31  
32  
33  
34  
35  
36  
37  
38  
39  
40  
41  
42  
43  
44  
45  
46  
47  
48  
49  
50  
51  
52  
53  
54  
55  
56  
57  
58  
59  
60

For peer review only

## References

1. Dunn CJ, Goa KL. Tranexamic acid: a review of its use in surgery and other indications. *Drugs* 1999; 57: 1005-1032.
2. Henry DA, Carless PA, Moxey AJ, et al. Anti-fibrinolytic use for minimising perioperative allogeneic blood transfusion. *Cochrane Database Syst Rev* 2011; 19: CD001886.
3. Ker K, Prieto-Merino D, Roberts I. Systematic review, meta-analysis and meta-regression of the effect of tranexamic acid on surgical blood loss. *Br J Surg* 2013; 100: 1271-1279.
4. Roberts I, Shakur H, Afolabi A, et al. The importance of early treatment with tranexamic acid in bleeding trauma patients: an exploratory analysis of the CRASH-2 randomised controlled trial.

1 Lancet 2011; 377: 1096-1101, 1101 e1091-1092.

2  
3  
4 5. Simonazzi G, Bisulli M, Saccone G, et al. Tranexamic acid for preventing postpartum blood loss  
5 after cesarean delivery: a systematic review and meta-analysis of randomized controlled trials. *Acta*  
6 *Obstet Gynecol Scand* 2016; 95: 28-37.

7  
8  
9  
10 6. Pundir V, Pundir J, Georgalas C, Fokkens WJ. Role of tranexamic acid in endoscopic sinus  
11 surgery - a systematic review and meta-analysis. *Rhinology* 2013; 51: 291-297.

12  
13  
14 7. Adler Ma SC, Brindle W, Burton G, et al. Tranexamic acid is associated with less blood  
15 transfusion in off-pump coronary artery bypass graft surgery: a systematic review and meta-analysis.  
16 *J Cardiothorac Vasc Anesth* 2011; 25: 26-35.

17  
18  
19 8. Yang ZG, Chen WP, Wu LD. Effectiveness and safety of tranexamic acid in reducing blood loss  
20 in total knee arthroplasty: a meta-analysis. *J Bone Joint Surg Am* 2012; 94: 1153-1159.

21  
22  
23 9. Ethgen O, Bruyere O, Richy F, Dardennes C, Reginster JY. Health-related quality of life in total  
24 hip and total knee arthroplasty. A qualitative and systematic review of the literature. *J Bone Joint*  
25 *Surg Am* 2004; 86-A: 963-974.

26  
27  
28  
29 10. Kurtz S, Ong K, Lau E, Mowat F, Halpern M. Projections of primary and revision hip and knee  
30 arthroplasty in the United States from 2005 to 2030. *J Bone Joint Surg Am* 2007; 89: 780-785.

31  
32  
33 11. Rasouli MR, Maltenfort MG, Erkokac OF, Austin MS, Waters JH, Parvizi J. Blood management  
34 after total joint arthroplasty in the United States: 19-year trend analysis. *Transfusion* 2016; 56:  
35 1112-1120.

36  
37  
38  
39 12. Sculco TP, Baldini A, Keating EM. Blood management in total joint arthroplasty. *Instr Course*  
40 *Lect* 2005; 54: 51-66.

41  
42  
43 13. Yue C, Pei F, Yang P, Xie J, Kang P. Effect of Topical Tranexamic Acid in Reducing Bleeding  
44 and Transfusions in TKA. *Orthopedics* 2015; 38: 315-324.

45  
46  
47 14. Wang H, Shen B, Zeng Y. Blood Loss and Transfusion After Topical Tranexamic Acid  
48 Administration in Primary Total Knee Arthroplasty. *Orthopedics* 2015; 38: e1007-1016.

49  
50  
51 15. Panteli M, Papakostidis C, Dahabreh Z, Giannoudis PV. Topical tranexamic acid in total knee  
52 replacement: a systematic review and meta-analysis. *Knee* 2013; 20: 300-309.

53  
54  
55 16. Gao F, Ma J, Sun W, Guo W, Li Z, Wang W. Topical fibrin sealant versus intravenous  
56

1 tranexamic acid for reducing blood loss following total knee arthroplasty: A systematic review and  
2 meta-analysis. *Int J Surg* 2016; 32: 31-37.  
3  
4

5  
6 17. Wang H, Shen B, Zeng Y. Comparison of topical versus intravenous tranexamic acid in primary  
7 total knee arthroplasty: a meta-analysis of randomized controlled and prospective cohort trials.  
8 *Knee* 2014; 21: 987-993.  
9

10  
11 18. Guzel Y, Gurcan OT, Golge UH, et al. Topical tranexamic acid versus autotransfusion after total  
12 knee arthroplasty. *J Orthop Surg (Hong Kong)*. 2016;24:179-82.  
13

14 19. Moher D, Liberati A, Tetzlaff J, Altman DG. Preferred reporting items for systematic reviews  
15 and meta-analyses: the PRISMA statement. *PLoS Med* 2009; 6: e1000097.  
16  
17

18 20. Jadad AR, Moore RA, Carroll D, et al. Assessing the quality of reports of randomized clinical  
19 trials: is blinding necessary? *Control Clin Trials* 1996; 17: 1-12.  
20  
21

22 21. Hozo SP, Djulbegovic B, Hozo I. Estimating the mean and variance from the median, range, and  
23 the size of a sample. *BMC Med Res Methodol* 2005; 5: 13.  
24  
25

26 22. Higgins JP, Thompson SG, Deeks JJ, Altman DG. Measuring inconsistency in meta-analyses.  
27 *BMJ* 2003; 327: 557-560.  
28  
29

30 23. Begg CB, Mazumdar M. Operating characteristics of a rank correlation test for publication bias.  
31 *Biometrics* 1994; 50: 1088-1101.  
32  
33

34 24. Egger M, Davey Smith G, Schneider M, Minder C. Bias in meta-analysis detected by a simple,  
35 graphical test. *BMJ* 1997; 315: 629-634.  
36  
37

38 25. Xie J, Ma J, Yue C, Kang P, Pei F. Combined use of intravenous and topical tranexamic acid  
39 following cementless total hip arthroplasty: a randomised clinical trial. *Hip Int* 2016; 26: 36-42.  
40  
41

42 26. Maniar RN, Kumar G, Singhi T, Nayak RM, Maniar PR. Most effective regimen of tranexamic  
43 acid in knee arthroplasty: a prospective randomized controlled study in 240 patients. *Clin Orthop*  
44 *Relat Res* 2012; 470: 2605-2612.  
45  
46  
47

48 27. Seo JG, Moon YW, Park SH, Kim SM, Ko KR. The comparative efficacies of intra-articular and  
49 IV tranexamic acid for reducing blood loss during total knee arthroplasty. *Knee Surg Sports*  
50 *Traumatol Arthrosc* 2013; 21: 1869-1874.  
51  
52  
53

54 28. Gomez-Barrena E, Ortega-Andreu M, Padilla-Eguiluz NG, Perez-Chrzanowska H, Figueredo-  
55 Zalve R. Topical intra-articular compared with intravenous tranexamic acid to reduce blood loss in  
56  
57

1 primary total knee replacement: a double-blind, randomized, controlled, noninferiority clinical trial.  
2 J Bone Joint Surg Am 2014; 96: 1937-1944.  
3  
4

5 29. Patel JN, Spanyer JM, Smith LS, Huang J, Yakkanti MR, Malkani AL. Comparison of  
6 intravenous versus topical tranexamic acid in total knee arthroplasty: a prospective randomized  
7 study. J Arthroplasty 2014; 29: 1528-1531.  
8  
9

10 30. Sarzaem MM, Razi M, Kazemian G, Moghaddam ME, Rasi AM, Karimi M. Comparing  
11 efficacy of three methods of tranexamic acid administration in reducing hemoglobin drop following  
12 total knee arthroplasty. J Arthroplasty 2014; 29: 1521-1524.  
13  
14

15 31. Soni A, Saini R, Gulati A, Paul R, Bhatti S, Rajoli SR. Comparison between intravenous and  
16 intra-articular regimens of tranexamic acid in reducing blood loss during total knee arthroplasty. J  
17 Arthroplasty 2014; 29: 1525-1527.  
18  
19

20 32. Wei W, Wei B. Comparison of topical and intravenous tranexamic acid on blood loss and  
21 transfusion rates in total hip arthroplasty. J Arthroplasty 2014; 29: 2113-2116.  
22  
23

24 33. Aguilera X, Martinez-Zapata MJ, Hinarejos P, et al. Topical and intravenous tranexamic acid  
25 reduce blood loss compared to routine hemostasis in total knee arthroplasty: a multicenter,  
26 randomized, controlled trial. Arch Orthop Trauma Surg 2015; 135: 1017-1025.  
27  
28

29 34. Digas G, Koutsogiannis I, Meletiadis G, Antonopoulou E, Karamoulas V, Bikos Ch. Intra-  
30 articular injection of tranexamic acid reduce blood loss in cemented total knee arthroplasty. Eur J  
31 Orthop Surg Traumatol 2015; 25: 1181-1188.  
32  
33

34 35. Oztas S, Ozturk A, Akalin Y, et al. The effect of local and systemic application of tranexamic  
35 acid on the amount of blood loss and allogeneic blood transfusion after total knee replacement. Acta  
36 Orthop Belg 2015; 81: 698-707.  
37  
38

39 36. Aggarwal AK, Singh N, Sudesh P. Topical vs Intravenous Tranexamic Acid in Reducing Blood  
40 Loss After Bilateral Total Knee Arthroplasty: A Prospective Study. J Arthroplasty 2016; 31: 1442-  
41 1448.  
42  
43

44 37. Chen JY, Chin PL, Moo IH, et al. Intravenous versus intra-articular tranexamic acid in total  
45 knee arthroplasty: A double-blinded randomised controlled noninferiority trial. Knee 2016; 23: 152-  
46 156.  
47  
48

49 38. Drosos GI, Ververidis A, Valkanis C, et al. A randomized comparative study of topical versus  
50  
51  
52  
53  
54  
55  
56

1 intravenous tranexamic acid administration in enhanced recovery after surgery (ERAS) total knee  
2 replacement. *J Orthop* 2016; 13: 127-131.

3  
4  
5 39. Keyhani S, Esmailiejah AA, Abbasian MR, Safdari F. Which Route of Tranexamic Acid  
6 Administration is More Effective to Reduce Blood Loss Following Total Knee Arthroplasty? *Arch*  
7 *Bone Jt Surg* 2016; 4: 65-69.

8  
9  
10 40. May JH, Rieser GR, Williams CG, Markert RJ, Bauman RD, Lawless MW. The Assessment of  
11 Blood Loss During Total Knee Arthroplasty When Comparing Intravenous vs Intracapsular  
12 Administration of Tranexamic Acid. *J Arthroplasty* 2016;31:2452-2457.

13  
14  
15 41. North WT, Mehran N, Davis JJ, Silverton CD, Weir RM, Laker MW. Topical vs Intravenous  
16 Tranexamic Acid in Primary Total Hip Arthroplasty: A Double-Blind, Randomized Controlled Trial.  
17 *J Arthroplasty* 2016; 31: 1022-1026.

18  
19  
20 42. Tzatzairis TK, Drosos GI, Kotsios SE, Ververidis AN, Vogiatzaki TD, Kazakos KI. Intravenous  
21 vs Topical Tranexamic Acid in Total Knee Arthroplasty Without Tourniquet Application: A  
22 Randomized Controlled Study. *J Arthroplasty* 2016;31:2465-2470.

23  
24  
25 43. Ugurlu M, Aksekili MA, Caglar C, Yuksel K, Sahin E, Akyol M. Effect of Topical and  
26 Intravenously Applied Tranexamic Acid Compared to Control Group on Bleeding in Primary  
27 Unilateral Total Knee Arthroplasty. *J Knee Surg* 2017;30:152-157.

28  
29  
30 44. Zhang Y, Zhang L, Ma X, et al. What is the optimal approach for tranexamic acid application in  
31 patients with unilateral total hip arthroplasty? *Orthopade* 2016;45:616-21.

32  
33  
34 45. Huang Z, Ma J, Shen B, Pei F. Combination of intravenous and topical application of  
35 tranexamic acid in primary total knee arthroplasty: a prospective randomized controlled trial. *J*  
36 *Arthroplasty* 2014; 29: 2342-2346.

37  
38  
39 46. Lin SY, Chen CH, Fu YC, Huang PJ, Chang JK, Huang HT. The efficacy of combined use of  
40 intraarticular and intravenous tranexamic acid on reducing blood loss and transfusion rate in total  
41 knee arthroplasty. *J Arthroplasty* 2015; 30: 776-780.

42  
43  
44 47. Jain NP, Nisthane PP, Shah NA. Combined Administration of Systemic and Topical Tranexamic  
45 Acid for Total Knee Arthroplasty: Can It Be a Better Regimen and Yet Safe? A Randomized  
46 Controlled Trial. *J Arthroplasty* 2016; 31: 542-547.

47  
48  
49 48. Nielsen CS, Jans O, Orsnes T, Foss NB, Troelsen A, Husted H. Combined Intra-Articular and  
50

1 Intravenous Tranexamic Acid Reduces Blood Loss in Total Knee Arthroplasty: A Randomized,  
2 Double-Blind, Placebo-Controlled Trial. *J Bone Joint Surg Am* 2016; 98: 835-841.

3  
4  
5 49. Wu YG, Zeng Y, Yang TM, Si HB, Cao F, Shen B. The Efficacy and Safety of Combination of  
6 Intravenous and Topical Tranexamic Acid in Revision Hip Arthroplasty: A Randomized, Controlled  
7 Trial. *J Arthroplasty* 2016;31:2548-2553.

8  
9  
10 50. Yi Z, Bin S, Jing Y, Zongke Z, Pengde K, Fuxing P. Tranexamic Acid Administration in Primary  
11 Total Hip Arthroplasty: A Randomized Controlled Trial of Intravenous Combined with Topical  
12 Versus Single-Dose Intravenous Administration. *J Bone Joint Surg Am* 2016;98: 983-991.

13  
14  
15 51. Nilsson IM. Clinical pharmacology of aminocaproic and tranexamic acids. *J Clin Pathol Suppl*  
16 (R Coll Pathol) 1980; 14: 41-47.

17  
18  
19 52. Sukeik M, Alshryda S, Haddad FS, Mason JM. Systematic review and meta-analysis of the use  
20 of tranexamic acid in total hip replacement. *J Bone Joint Surg Br* 2011;93:39-46.

21  
22  
23 53. Aglietti P, Baldini A, Vena LM, Abbate R, Fedi S, Falciani M. Effect of tourniquet use on  
24 activation of coagulation in total knee replacement. *Clin Orthop Relat Res* 2000; 371: 169-177.

25  
26  
27 54. Sun X, Dong Q, Zhang YG. Intravenous versus topical tranexamic acid in primary total hip  
28 replacement: A systemic review and meta-analysis. *Int J Surg* 2016;32:10-8.

29  
30  
31 55. Shemshaki H, Nourian SM, Nourian N, Dehghani M, Mokhtari M, Mazoochian F. One step  
32 closer to sparing total blood loss and transfusion rate in total knee arthroplasty: a meta-analysis of  
33 different methods of tranexamic acid administration. *Arch Orthop Trauma Surg* 2015; 135: 573-588.

34  
35  
36 56. Wei Z, Liu M. The effectiveness and safety of tranexamic acid in total hip or knee arthroplasty:  
37 a meta-analysis of 2720 cases. *Transfus Med* 2015; 25: 151-162.

38  
39  
40 57. Wu Q, Zhang HA, Liu SL, Meng T, Zhou X, Wang P. Is tranexamic acid clinically effective and  
41 safe to prevent blood loss in total knee arthroplasty? A meta-analysis of 34 randomized controlled  
42 trials. *Eur J Orthop Surg Traumatol* 2015; 25: 525-541.

43  
44  
45 58. Yu X, Li W, Xu P, Liu J, Qiu Y, Zhu Y. Safety and Efficacy of Tranexamic Acid in Total Knee  
46 Arthroplasty. *Med Sci Monit* 2015; 21: 3095-3103.

47  
48  
49 59. Chen S, Wu K, Kong G, Feng W, Deng Z, Wang H. The efficacy of topical tranexamic acid in  
50 total hip arthroplasty: a meta-analysis. *BMC Musculoskelet Disord* 2016; 17: 81.

- 1  
2  
3  
4  
5  
6  
7  
8  
9  
10  
11  
12  
13  
14  
15  
16  
17  
18  
19  
20  
21  
22  
23  
24  
25  
26  
27  
28  
29  
30  
31  
32  
33  
34  
35  
36  
37  
38  
39  
40  
41  
42  
43  
44  
45  
46  
47  
48  
49
60. Huang GP, Jia XF, Xiang Z, et al. Tranexamic Acid Reduces Hidden Blood Loss in Patients Undergoing Total Knee Arthroplasty: A Comparative Study and Meta-Analysis. *Med Sci Monit* 2016; 22: 797-802.
61. Sun X, Dong Q, Zhang YG. Intravenous versus topical tranexamic acid in primary total hip replacement: A systemic review and meta-analysis. *Int J Surg* 2016; 32: 10-18.
62. Wong J, Abrishami A, El Beheiry H, et al. Topical application of tranexamic acid reduces postoperative blood loss in total knee arthroplasty: a randomized, controlled trial. *J Bone Joint Surg Am* 2010; 92: 2503-2513.
63. Sa-Ngasoongsong P, Wongsak S, Chanplakorn P, et al. Efficacy of low-dose intra-articular tranexamic acid in total knee replacement; a prospective triple-blinded randomized controlled trial. *BMC Musculoskelet Disord* 2013; 14: 340.
64. Zhang W, Li N, Chen S, Tan Y, Al-Aidaros M, Chen L. The effects of a tourniquet used in total knee arthroplasty: a meta-analysis. *J Orthop Surg Res* 2014; 9: 13.

50  
51

**Figure legends:**

52  
53

Figure 1. The flowdiagram showing the study selection process.

54  
55  
56

Figure 2. Forest plot comparing the efficacy of intravenous versus topical TXA on total blood loss.

1 Figure 3. Forest plot comparing the efficacy of intravenous versus topical TXA on postoperative hemoglobin  
2 levels.  
3

4  
5 Figure 4. Forest plot comparing the efficacy of intravenous versus topical TXA on postoperative transfusion rate.  
6

7 Figure 5. Forest plot comparing the safety of intravenous versus topical TXA on postoperative venous  
8 thromboembolism.  
9

10  
11 Figure 6. Forest plot comparing the efficacy of intravenous versus combination of intravenous and topical TXA on  
12 total blood loss.  
13

14 Figure 7. Forest plot comparing the efficacy of intravenous versus combination of intravenous and topical TXA on  
15 blood transfusion rate.  
16

17  
18 Figure 8. Forest plot comparing the safety of intravenous versus combination of intravenous and topical TXA on  
19 postoperative venous thromboembolism.  
20



1  
2  
3  
4  
5  
6  
7  
8  
9  
10  
11  
12  
13  
14  
15  
16  
17  
18  
19  
20  
21  
22  
23  
24  
25  
26  
27  
28  
29  
30  
31  
32  
33  
34  
35  
36  
37  
38  
39  
40  
41  
42  
43  
44  
45  
46  
47  
48  
49  
50  
51  
52  
53  
54  
55  
56  
57  
58  
59  
60

For peer review only

Table 1. Characteristics of prospective studies comparing topical with intravenous tranexamic acid in patients receiving total knee or hip arthroplasty.

| Author (year)               | Sample size | Region | Mean age | Female, % | Surgery         | IV regimen | Topical regimen | Transfusion threshold                                                                                    | Tourniquet use | TP         | Jadad score |
|-----------------------------|-------------|--------|----------|-----------|-----------------|------------|-----------------|----------------------------------------------------------------------------------------------------------|----------------|------------|-------------|
| Maniar et al. (2012)        | 80          | India  | 67       | 80        | Unilateral TKA  | 10mg/kg    | 3g              | Hb< 8.5 g/dL without CHD, Hb< 10 g/dL with CHD, anemic symptoms, organ dysfunction                       | Yes            | LMWH       | 5           |
| Seo et al. (2013)           | 100         | Korea  | 67       | 89        | Unilateral TKA  | 1.5g       | 1.5g            | Hb< 8 g/dL, anemic symptoms/organ dysfunction when Hb< 10g/dL                                            | Yes            | NA         | 2           |
| Patel et al. (2014)         | 89          | USA    | 65       | 74        | Unilateral TKA  | 10mg/kg    | 2g              | Hb< 8 g/dL with anemic symptoms                                                                          | Yes            | LMWH       | 5           |
| Sarzaeem et al. (2014)      | 100         | Iran   | 68       | 86        | Unilateral TKA  | 0.5g       | 3g              | Hb< 8 g/dL, anemic symptoms/organ dysfunction when Hb< 10g/dL                                            | Yes            | NA         | 3           |
| Gomez-Barrena et al. (2014) | 78          | Spain  | 71       | 65        | Unilateral THA  | 15mg/kg*2  | 3g              | Hb< 8 g/dL, anemic symptoms/organ dysfunction when Hb< 10g/dL                                            | Yes            | Enoxaparin | 5           |
| Soni et al. (2014)          | 40          | India  | 69       | 73        | Unspecified TKA | 10mg/kg*3  | 3g              | Hb< 8 g/dL                                                                                               | Yes            | LMWH       | 2           |
| Wei et al. (2014)           | 203         | China  | 62       | 64        | THA             | 3g         | 3g              | Hb< 9 g/dL                                                                                               | -              | LMWH       | 5           |
| Aguilera et al. (2015)      | 100         | Spain  | 73       | 70        | Primary TKA     | 2g         | 1g              | Hb< 8 g/dL, Hb< 8.5 g/dL with CHD or over 70 years, Hb< 9 g/dL with anemic symptoms or organ dysfunction | Yes            | LMWH       | 3           |

|                          |     |        |    |    |                |                  |    |                                                                                     |     |                                     |   |
|--------------------------|-----|--------|----|----|----------------|------------------|----|-------------------------------------------------------------------------------------|-----|-------------------------------------|---|
| Digas et al. (2015)      | 60  | Greece | 71 | 85 | Unilateral TKA | 15mg/kg          | 2g | Hb< 8.5 g/dL without CHD, Hb< 9.5 g/dL with CHD, anemic symptoms, organ dysfunction | Yes | Tinzaparin                          | 3 |
| Oztas et al. (2015)      | 60  | Turkey | 68 | 85 | Unilateral TKA | 15mg/kg +10mg/kg | 2g | Hb< 8 g/dL, anemic symptoms/ organ dysfunction when Hb< 10g/dL                      | Yes | Enoxaparin                          | 3 |
| Tzatzairis et al. (2016) | 80  | Greece | 69 | 80 | Unilateral TKA | 1g               | 1g | Hb< 10 g/dL, anemic symptoms/ organ dysfunction                                     | No  | LMWH                                | 3 |
| North et al. (2016)      | 139 | USA    | 65 | 23 | Unilateral THA | 2g               | 2g | Hb<7 g/dL, symptomatic anemia and Hb<8 g/dL                                         | -   | Enoxaparin, rivaroxaban, or aspirin | 5 |
| Ugurlu et al. (2016)     | 82  | Turkey | 70 | 76 | Unilateral TKA | 20mg/kg          | 3g | Hb<8 g/dL                                                                           | Yes | enoxaparin                          | 3 |
| Zhang et al. (2016)      | 50  | China  | 44 | 46 | Unilateral THA | 1g               | 1g | Hb<8 g/dL, symptomatic anemia and Hb< 10 g/dL                                       | -   | LMWH                                | 3 |
| May et al. (2016)        | 131 | USA    | 64 | 78 | Unilateral TKA | 2g               | 2g | Hb<7 g/dL, symptomatic anemia and Hb<10 g/dL                                        | Yes | LMWH or oral Xa inhibitor           | 5 |
| Keyhani et al. (2016)    | 80  | Iran   | 68 | 39 | Unilateral TKA | 0.5g             | 3g | Hb<8 g/dL                                                                           | Yes | LMWH                                | 2 |
| Drosos et al. (2016)     | 60  | Greece | 70 | 80 | Unilateral TKA | 1g               | 1g | Hb< 10 g/dL, anemic symptoms/ organ dysfunction                                     | Yes | NA                                  | 2 |

|                        |     |           |    |    |                |         |         |                                                                   |     |            |   |
|------------------------|-----|-----------|----|----|----------------|---------|---------|-------------------------------------------------------------------|-----|------------|---|
| Chen et al. (2016)     | 100 | Singapore | 65 | 75 | Unilateral TKA | 1.5g    | 1.5g    | Hb< 8 g/dL, anemic symptoms/<br>organ dysfunction when Hb< 10g/dL | Yes | LMWH       | 5 |
| Aggarwal et al. (2016) | 70  | India     | 57 | 36 | Bilateral TKA  | 15mg/kg | 15mg/kg | Hb< 8 g/dL, Hct< 25%                                              | Yes | Aspirin    | 4 |
| Xie et al. (2016)      | 210 | China     | 61 | 68 | THA            | 1.5g    | 3g      | Hb< 7 g/dL, anemic symptoms/<br>organ dysfunction when Hb< 10g/dL | NA  | Enoxaparin | 5 |

\* Hb, hemoglobin; Hct, hematocrit; IV, intravenous; LMWH, low molecular weight heparin; LOS, length of stay; MT, mechanical thromboprophylaxis; NA, not available; THA, total hip arthroplasty; TKA, total knee arthroplasty; TP, thromboembolism prophylaxis; TXA, tranexamic acid; VTE, venous thromboembolism.

Table 2. Characteristics of prospective studies comparing combination of topical and intravenous tranexamic acid with placebo in patients receiving total knee or hip arthroplasty.

| Author (year)         | Sample size | Region  | Mean age | Female, % | Surgery        | Combination regimen                                                | Single regimen                                    | Transfusion threshold                                                    | Tourniquet use | TP          | Jadad score |
|-----------------------|-------------|---------|----------|-----------|----------------|--------------------------------------------------------------------|---------------------------------------------------|--------------------------------------------------------------------------|----------------|-------------|-------------|
| Huang et al. (2014)   | 184         | China   | 65       | 64        | Unilateral TKA | IV: 1.5g + topical: 1.5g                                           | IV: 3g                                            | Hb < 7 g/dL, anemic symptoms/ organ dysfunction when Hb < 10 g/dL        | Yes            | LMWH        | 5           |
| Lin et al. (2015)     | 120         | China   | 71       | 79        | Unilateral TKA | IV: 1g + topical: 1g                                               | topical: 1g                                       | Hb < 8 g/dL, anemic symptoms/ organ dysfunction when Hb < 9 g/dL         | Yes            | Rivaroxaban | 3           |
| Nielsen et al. (2016) | 60          | Denmark | 64       | 53        | Unilateral TKA | IV: 1g + topical: 3g                                               | IV: 1g                                            | Hb < 7.5 g/dL, Hb < 10 g/dL with CHD, anemic symptoms with Hb drop > 25% | No             | Rivaroxaban | 5           |
| Jain et al. (2016)    | 119         | India   | 69       | 63        | Unilateral TKA | IV: (15 mg/kg preoperative + 10mg/kg postoperative) + topical: 2 g | IV: 15 mg/kg preoperative + 10mg/kg postoperative | Hb < 7 g/dL, anemic symptoms/ organ dysfunction when Hb < 8 g/dL         | Yes            | Aspirin     | 3           |
| Zeng et al. (2016)    | 100         | China   | 53.4     | 47        | THA            | IV: 15 mg/kg + topical: 1 g                                        | IV: 15 mg/kg                                      | Hb < 7 g/dL, anemic symptoms/ organ dysfunction when Hb < 10g/dL         | NA             | Enoxaparin  | 5           |

|                   |     |       |    |    |     |                             |                      |                                                                  |    |            |   |
|-------------------|-----|-------|----|----|-----|-----------------------------|----------------------|------------------------------------------------------------------|----|------------|---|
| Xie et al. (2016) | 210 | China | 61 | 68 | THA | IV: 1g + topical: 2g.       | IV: 1.5g, topical 3g | Hb < 7 g/dL, anemic symptoms/ organ dysfunction when Hb < 10g/dL | NA | Enoxaparin | 5 |
| Wu et al. (2016)  | 84  | China | 60 | 48 | THA | IV: 15 mg/kg + topical: 3 g | IV: 15 mg/kg         | Hb < 8 g/dL, anemic symptoms                                     | NA | LMWH       | 3 |

\*Hb, hemoglobin; Hct, hematocrit; IV, intravenous; LMWH, low molecular weight heparin; LOS, length of stay; MT, mechanical thromboprophylaxis; NA, not available; THA, total hip arthroplasty; TKA, total knee arthroplasty; TP, thromboembolism prophylaxis; TXA, tranexamic acid; VTE, venous thromboembolism.

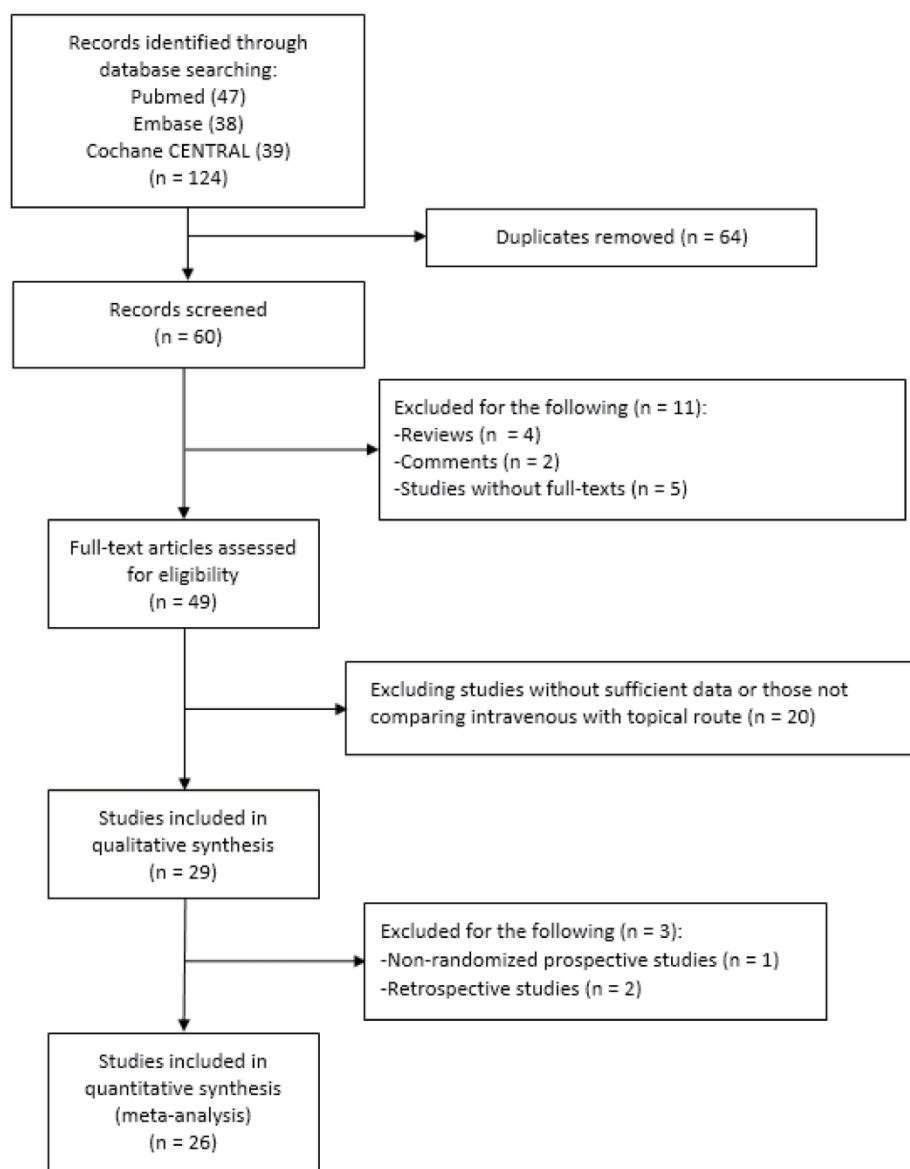

45 Figure 1. The flowdiagram showing the study selection process.

46 215x258mm (300 x 300 DPI)

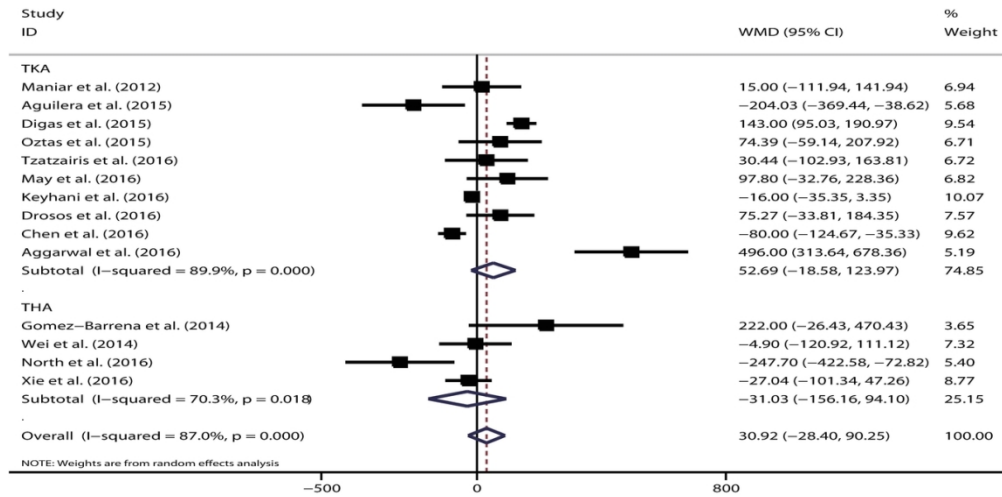

Figure 2. Forest plot comparing the efficacy of intravenous versus topical TXA on total blood loss.

114x57mm (300 x 300 DPI)



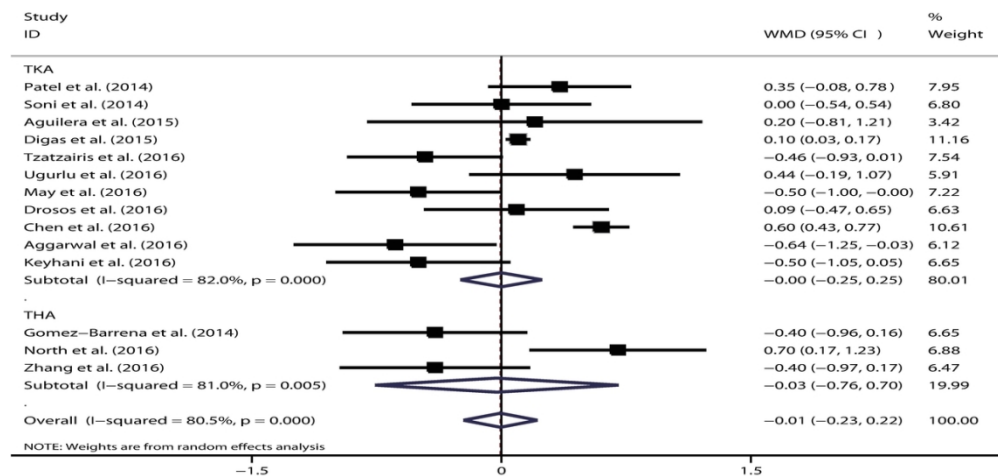

Figure 3. Forest plot comparing the efficacy of intravenous versus topical TXA on postoperative hemoglobin levels.

111x53mm (300 x 300 DPI)

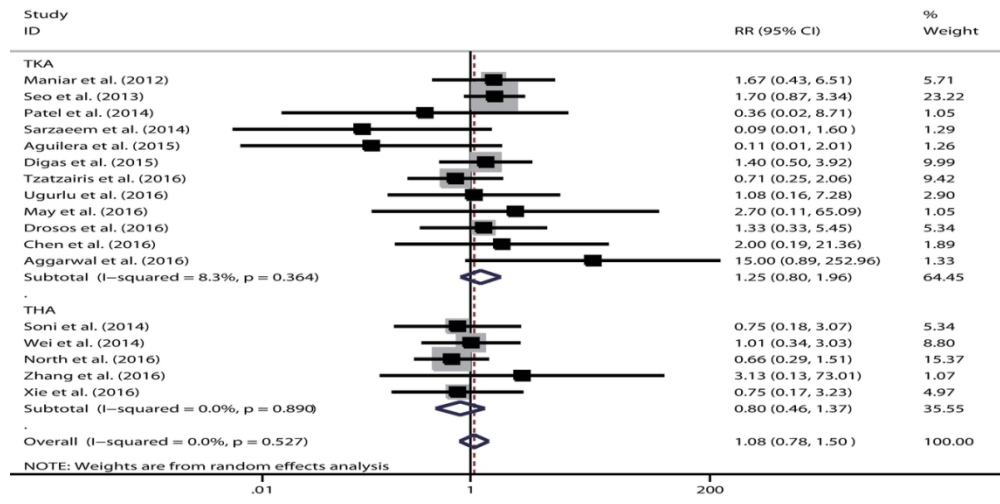

Figure 4. Forest plot comparing the efficacy of intravenous versus topical TXA on postoperative transfusion rate.

113x55mm (300 x 300 DPI)

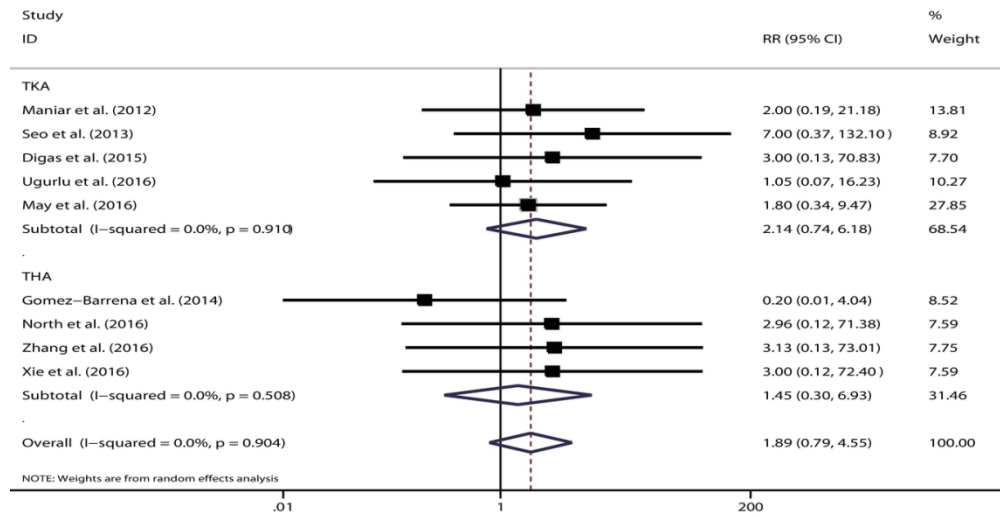

Figure 5. Forest plot comparing the safety of intravenous versus topical TXA on postoperative venous thromboembolism.

115x58mm (300 x 300 DPI)

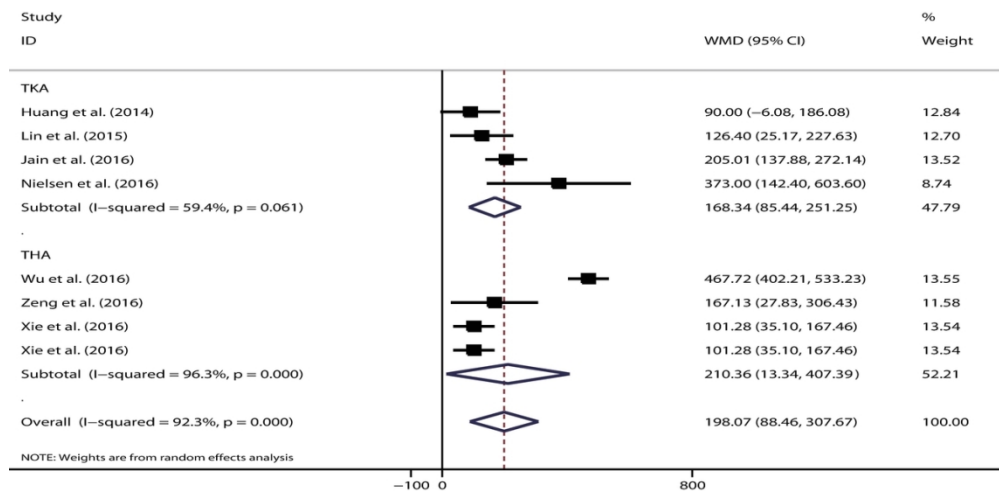

Figure 6. Forest plot comparing the efficacy of intravenous versus combination of intravenous and topical TXA on total blood loss.

112x54mm (300 x 300 DPI)

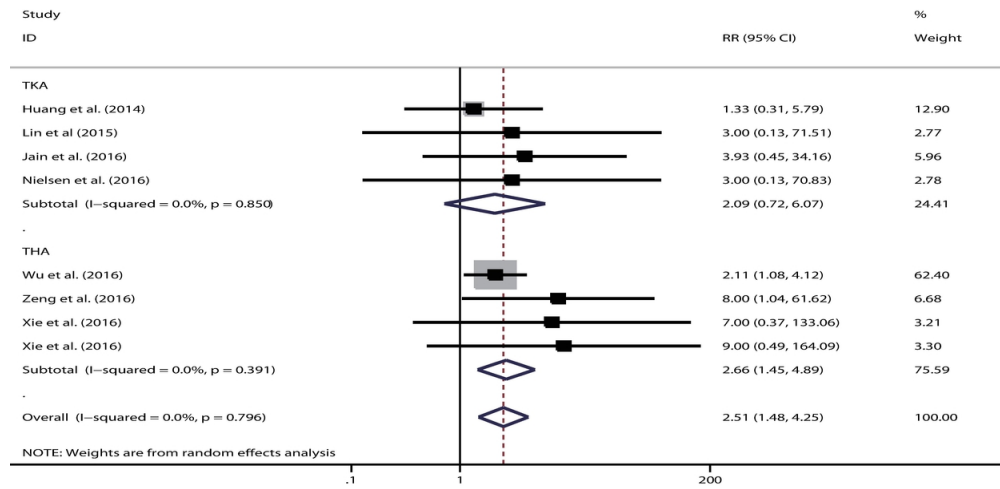

Figure 7. Forest plot comparing the efficacy of intravenous versus combination of intravenous and topical TXA on blood transfusion rate.

105x50mm (300 x 300 DPI)

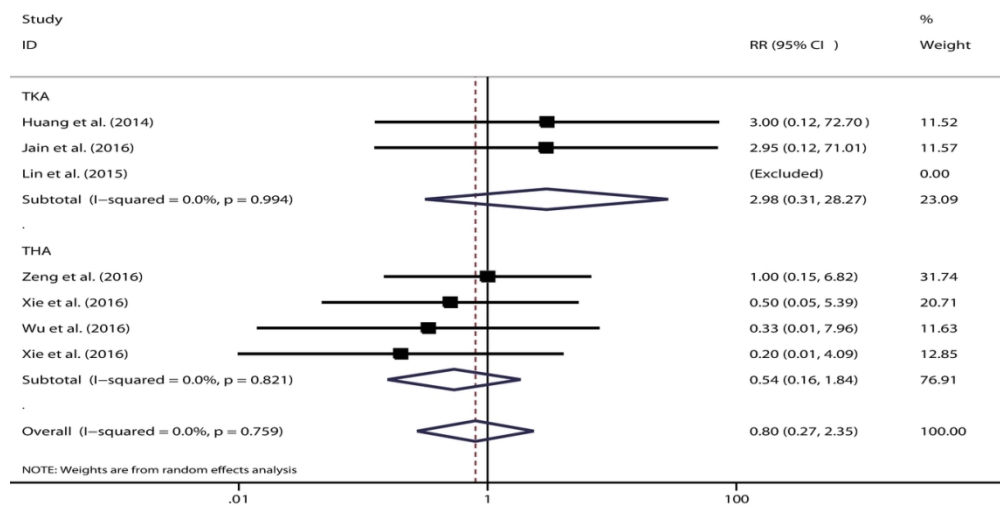

Figure 8. Forest plot comparing the safety of intravenous versus combination of intravenous and topical TXA on postoperative venous thromboembolism.

115x56mm (300 x 300 DPI)

1  
2  
3  
4  
5  
6  
7  
8  
9  
10  
11  
12  
13  
14  
15  
16  
17  
18  
19  
20  
21  
22  
23  
24  
25  
26  
27  
28  
29  
30  
31  
32  
33  
34  
35  
36  
37  
38  
39  
40  
41  
42  
43  
44  
45  
46  
47

**Supplemental Table 1. Quality assessment of studies by the Jadad scale.**

| Author (year)               | Randomization |             | Blinding  |             | Description of withdrawal and dropouts | Total score |
|-----------------------------|---------------|-------------|-----------|-------------|----------------------------------------|-------------|
|                             | Mentioned     | Appropriate | Mentioned | Appropriate |                                        |             |
| Maniar et al. (2012)        | 1             | 1           | 1         | 1           | 1                                      | 5           |
| Seo et al. (2013)           | 1             | 1           | 0         | 0           | 0                                      | 2           |
| Lin et al. (2015)           | 1             | 1           | 0         | 0           | 1                                      | 3           |
| Huang et al. (2014)         | 1             | 1           | 1         | 1           | 1                                      | 5           |
| Patel et al. (2014)         | 1             | 1           | 1         | 1           | 1                                      | 5           |
| Sarzaem et al. (2014)       | 1             | 1           | 1         | 0           | 0                                      | 3           |
| Gomez-Barrena et al. (2014) | 1             | 1           | 1         | 1           | 1                                      | 5           |
| Soni et al. (2014)          | 1             | 1           | 0         | 0           | 0                                      | 2           |

|                          |   |   |   |   |   |   |
|--------------------------|---|---|---|---|---|---|
| Wei et al. (2014)        | 1 | 1 | 1 | 1 | 1 | 5 |
| Aguilera et al. (2015)   | 1 | 1 | 0 | 0 | 1 | 3 |
| Digas et al. (2015)      | 1 | 1 | 1 | 0 | 0 | 3 |
| Oztas et al. (2015)      | 1 | 0 | 0 | 0 | 0 | 1 |
| Tzatzairis et al. (2016) | 1 | 1 | 0 | 0 | 1 | 3 |
| North et al. (2016)      | 1 | 1 | 1 | 1 | 1 | 5 |
| Ugurlu et al. (2016)     | 1 | 1 | 0 | 0 | 1 | 3 |
| Zhang et al. (2016)      | 1 | 1 | 0 | 0 | 1 | 3 |
| May et al. (2016)        | 1 | 1 | 1 | 1 | 1 | 5 |
| Keyhani et al.(2016)     | 1 | 0 | 0 | 0 | 1 | 2 |
| Drosos et al. (2016)     | 1 | 1 | 0 | 0 | 0 | 2 |
| Chen et al. (2016)       | 1 | 1 | 1 | 1 | 1 | 5 |



1  
2  
3  
4  
5  
6  
7  
8  
9  
10  
11  
12  
13  
14  
15  
16  
17  
18  
19  
20  
21  
22  
23  
24  
25  
26  
27  
28  
29  
30  
31  
32  
33  
34  
35  
36  
37  
38  
39  
40  
41  
42  
43  
44  
45  
46  
47

|                        |   |   |   |   |   |   |
|------------------------|---|---|---|---|---|---|
| Aggarwal et al. (2016) | 1 | 1 | 1 | 1 | 0 | 4 |
| Xie et al. (2016)      | 1 | 1 | 1 | 1 | 1 | 5 |
| Zeng et al. (2016)     | 1 | 1 | 1 | 1 | 1 | 5 |
| Jain et al. (2016)     | 1 | 1 | 0 | 0 | 1 | 3 |
| Nielsen et al. (2016)  | 1 | 1 | 1 | 1 | 1 | 5 |
| Wu et al. (2016)       | 1 | 1 | 0 | 0 | 1 | 3 |

For peer review only

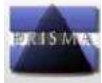

# PRISMA 2009 Checklist

| Section/topic                      | #  | Checklist item                                                                                                                                                                                                                                                                                              | Reported on page # |
|------------------------------------|----|-------------------------------------------------------------------------------------------------------------------------------------------------------------------------------------------------------------------------------------------------------------------------------------------------------------|--------------------|
| <b>TITLE</b>                       |    |                                                                                                                                                                                                                                                                                                             |                    |
| Title                              | 1  | Identify the report as a systematic review, meta-analysis, or both.                                                                                                                                                                                                                                         | 1                  |
| <b>ABSTRACT</b>                    |    |                                                                                                                                                                                                                                                                                                             |                    |
| Structured summary                 | 2  | Provide a structured summary including, as applicable: background; objectives; data sources; study eligibility criteria, participants, and interventions; study appraisal and synthesis methods; results; limitations; conclusions and implications of key findings; systematic review registration number. | 2                  |
| <b>INTRODUCTION</b>                |    |                                                                                                                                                                                                                                                                                                             |                    |
| Rationale                          | 3  | Describe the rationale for the review in the context of what is already known.                                                                                                                                                                                                                              | 3                  |
| Objectives                         | 4  | Provide an explicit statement of questions being addressed with reference to participants, interventions, comparisons, outcomes, and study design (PICOS).                                                                                                                                                  | 3                  |
| <b>METHODS</b>                     |    |                                                                                                                                                                                                                                                                                                             |                    |
| Protocol and registration          | 5  | Indicate if a review protocol exists, if and where it can be accessed (e.g., Web address), and, if available, provide registration information including registration number.                                                                                                                               |                    |
| Eligibility criteria               | 6  | Specify study characteristics (e.g., PICOS, length of follow-up) and report characteristics (e.g., years considered, language, publication status) used as criteria for eligibility, giving rationale.                                                                                                      | 4                  |
| Information sources                | 7  | Describe all information sources (e.g., databases with dates of coverage, contact with study authors to identify additional studies) in the search and date last searched.                                                                                                                                  | 4                  |
| Search                             | 8  | Present full electronic search strategy for at least one database, including any limits used, such that it could be repeated.                                                                                                                                                                               | 4                  |
| Study selection                    | 9  | State the process for selecting studies (i.e., screening, eligibility, included in systematic review, and, if applicable, included in the meta-analysis).                                                                                                                                                   | 4                  |
| Data collection process            | 10 | Describe method of data extraction from reports (e.g., piloted forms, independently, in duplicate) and any processes for obtaining and confirming data from investigators.                                                                                                                                  | 4                  |
| Data items                         | 11 | List and define all variables for which data were sought (e.g., PICOS, funding sources) and any assumptions and simplifications made.                                                                                                                                                                       | 4                  |
| Risk of bias in individual studies | 12 | Describe methods used for assessing risk of bias of individual studies (including specification of whether this was done at the study or outcome level), and how this information is to be used in any data synthesis.                                                                                      | 4                  |
| Summary measures                   | 13 | State the principal summary measures (e.g., risk ratio, difference in means).                                                                                                                                                                                                                               | 4                  |
| Synthesis of results               | 14 | Describe the methods of handling data and combining results of studies, if done, including measures of consistency (e.g., $I^2$ ) for each meta-analysis.                                                                                                                                                   | 4-5                |

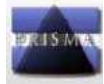

# PRISMA 2009 Checklist

1  
2  
3  
4  
5  
6  
7  
8  
9  
10  
11  
12  
13  
14  
15  
16  
17  
18  
19  
20  
21  
22  
23  
24  
25  
26  
27  
28  
29  
30  
31  
32  
33  
34  
35  
36  
37  
38  
39  
40  
41  
42  
43  
44  
45  
46  
47

| Section/topic                 | #  | Checklist item                                                                                                                                                                                           | Reported on page # |
|-------------------------------|----|----------------------------------------------------------------------------------------------------------------------------------------------------------------------------------------------------------|--------------------|
| Risk of bias across studies   | 15 | Specify any assessment of risk of bias that may affect the cumulative evidence (e.g., publication bias, selective reporting within studies).                                                             | 4-5                |
| Additional analyses           | 16 | Describe methods of additional analyses (e.g., sensitivity or subgroup analyses, meta-regression), if done, indicating which were pre-specified.                                                         | 4-5                |
| <b>RESULTS</b>                |    |                                                                                                                                                                                                          |                    |
| Study selection               | 17 | Give numbers of studies screened, assessed for eligibility, and included in the review, with reasons for exclusions at each stage, ideally with a flow diagram.                                          | 5                  |
| Study characteristics         | 18 | For each study, present characteristics for which data were extracted (e.g., study size, PICOS, follow-up period) and provide the citations.                                                             | 5                  |
| Risk of bias within studies   | 19 | Present data on risk of bias of each study and, if available, any outcome level assessment (see item 12).                                                                                                | 5                  |
| Results of individual studies | 20 | For all outcomes considered (benefits or harms), present, for each study: (a) simple summary data for each intervention group (b) effect estimates and confidence intervals, ideally with a forest plot. | 5,6,7,8            |
| Synthesis of results          | 21 | Present results of each meta-analysis done, including confidence intervals and measures of consistency.                                                                                                  | 5,6,7,8            |
| Risk of bias across studies   | 22 | Present results of any assessment of risk of bias across studies (see Item 15).                                                                                                                          | 5,6,7,8            |
| Additional analysis           | 23 | Give results of additional analyses, if done (e.g., sensitivity or subgroup analyses, meta-regression [see Item 16]).                                                                                    | 5,6,7,8            |
| <b>DISCUSSION</b>             |    |                                                                                                                                                                                                          |                    |
| Summary of evidence           | 24 | Summarize the main findings including the strength of evidence for each main outcome; consider their relevance to key groups (e.g., healthcare providers, users, and policy makers).                     | 8,9,10             |
| Limitations                   | 25 | Discuss limitations at study and outcome level (e.g., risk of bias), and at review-level (e.g., incomplete retrieval of identified research, reporting bias).                                            | 10                 |
| Conclusions                   | 26 | Provide a general interpretation of the results in the context of other evidence, and implications for future research.                                                                                  | 10                 |
| <b>FUNDING</b>                |    |                                                                                                                                                                                                          |                    |
| Funding                       | 27 | Describe sources of funding for the systematic review and other support (e.g., supply of data); role of funders for the systematic review.                                                               | 11                 |

From: Moher D, Liberati A, Tetzlaff J, Altman DG, The PRISMA Group (2009). Preferred Reporting Items for Systematic Reviews and Meta-Analyses: The PRISMA Statement. PLoS Med 6(6): e1000097. doi:10.1371/journal.pmed1000097

For more information, visit: [www.prisma-statement.org](http://www.prisma-statement.org).

# BMJ Open

## COMPARISON OF INTRAVENOUS, TOPICAL, OR COMBINED ROUTES OF TRANEXAMIC ACID ADMINISTRATION IN PATIENTS UNDERGOING TOTAL KNEE AND HIP ARTHROPLASTY: A META-ANALYSIS OF RANDOMISED CONTROLLED TRIALS

|                                 |                                                                                                                                                                                                                                                                                                                                                                                                                                                                                                                                                                                                                                  |
|---------------------------------|----------------------------------------------------------------------------------------------------------------------------------------------------------------------------------------------------------------------------------------------------------------------------------------------------------------------------------------------------------------------------------------------------------------------------------------------------------------------------------------------------------------------------------------------------------------------------------------------------------------------------------|
| Journal:                        | <i>BMJ Open</i>                                                                                                                                                                                                                                                                                                                                                                                                                                                                                                                                                                                                                  |
| Manuscript ID                   | bmjopen-2018-024350.R1                                                                                                                                                                                                                                                                                                                                                                                                                                                                                                                                                                                                           |
| Article Type:                   | Research                                                                                                                                                                                                                                                                                                                                                                                                                                                                                                                                                                                                                         |
| Date Submitted by the Author:   | 21-Oct-2018                                                                                                                                                                                                                                                                                                                                                                                                                                                                                                                                                                                                                      |
| Complete List of Authors:       | Sun, Qi; Dongzhimen Hospital, Beijing University of Chinese Medicine, Department of Orthopedics<br>Li, Jinyu; Dongzhimen Hospital, Beijing University of Chinese Medicine, Department of Orthopedics<br>Chen, Jiang; Dongzhimen Hospital, Beijing University of Chinese Medicine, Department of Orthopedics<br>Zheng, Chenying; Dongzhimen Hospital, Beijing University of Chinese Medicine, Department of Orthopedics<br>Liu, Chuyin; Dongzhimen Hospital, Beijing University of Chinese Medicine, Department of Orthopedics<br>Jia, Yusong; Beijing University of Chinese Medicine Affiliated Dongzhimen Hospital, Orthopedics |
| <b>Primary Subject Heading</b>: | Evidence based practice                                                                                                                                                                                                                                                                                                                                                                                                                                                                                                                                                                                                          |
| Secondary Subject Heading:      | Evidence based practice                                                                                                                                                                                                                                                                                                                                                                                                                                                                                                                                                                                                          |
| Keywords:                       | tranexamic acid, total knee arthroplasty, total hip arthroplasty, IV, topical, meta-analysis                                                                                                                                                                                                                                                                                                                                                                                                                                                                                                                                     |
|                                 |                                                                                                                                                                                                                                                                                                                                                                                                                                                                                                                                                                                                                                  |

SCHOLARONE™  
Manuscripts

---

1  
2  
3 **COMPARISON OF INTRAVENOUS, TOPICAL, OR COMBINED ROUTES OF**  
4 **TRANEXAMIC ACID ADMINISTRATION IN PATIENTS UNDERGOING TOTAL KNEE**  
5 **AND HIP ARTHROPLASTY: A META-ANALYSIS OF RANDOMISED CONTROLLED**  
6 **TRIALS**  
7  
8  
9

10 Qi Sun<sup>1¶</sup>, Jinyu Li<sup>1¶</sup>, Jiang Chen<sup>1</sup>, Chenying Zheng<sup>1</sup>, Chuyin Liu<sup>1</sup>, Yusong Jia<sup>1\*</sup>

11  
12  
13 <sup>1</sup>Department of Orthopedics, Dongzhimen Hospital, Beijing University of Chinese Medicine, Beijing ,  
14  
15  
16 China.

17  
18  
19  
20  
21  
22 \*Corresponding author: E-mail: [spioneer2001@sina.com](mailto:spioneer2001@sina.com)  
23  
24  
25  
26  
27

28 Qi Sun: [sunqi2001@sina.com](mailto:sunqi2001@sina.com)  
29

30  
31 Jinyu Li: [lijinyu84@126.com](mailto:lijinyu84@126.com)  
32

33  
34 Jiang Chen: [964402173@qq.com](mailto:964402173@qq.com)  
35

36  
37 Chenying Zheng: [zhengchenying99@sina.com](mailto:zhengchenying99@sina.com)  
38

39  
40 Chuyin Liu: [1827193473@qq.com](mailto:1827193473@qq.com)  
41  
42  
43  
44  
45  
46

47 <sup>¶</sup>These authors contributed equally to this work.  
48  
49  
50  
51

52 **Running title:** TXA in treatment of TKA or THA  
53  
54  
55  
56  
57  
58  
59  
60

## Abbreviations, Nomenclature and Symbols

TXA: tranexamic acid; TKA: total knee arthroplasty; THA: total hip arthroplasty; RCT: randomized controlled trials; RR: relative risk; WMD: weighted mean difference; CI: confidence interval; IV: intravenous; Hb: hemoglobin; LOS: length of stay; VTE: venous thromboembolism; TJA: total joint arthroplasty; PE: pulmonary embolism; DVT: deep vein thrombosis; LMWH: low molecular weight heparin.

## ABSTRACT

**Objective:** This study aimed to compare the effects of intravenous (IV), topical, and combined routes of tranexamic acid (TXA) administration on blood loss and transfusion requirements in patients undergoing total knee and hip arthroplasty (TKA and THA).

**Design:** This was a meta-analysis of randomised controlled trials (RCTs) wherein the weighted mean difference (WMD) and relative risk (RR) were used for data synthesis applied in the random effects model. Stratified analyses based on the surgery type, region, IV and topical TXA dose and transfusion protocol were also conducted. The main outcomes included intraoperative and total blood loss volume, transfusion rate, low postoperative haemoglobin (Hb) level, and postoperative Hb decline. However, the secondary outcomes included length of hospital stay (LOS) and/or occurrence of venous thromboembolism (VTE).

**Setting:** We searched the PubMed, Embase and Cochrane CENTRAL databases for RCTs that compared different routes of TXA administration.

**Participants:** Patients undergoing TKA or THA

**Interventions:** IV, topical or combined IV, and topical TXA

1  
2  
3 **Results:** Twenty-six RCTs were selected, and the IV route did not differ substantially from the topical  
4 route with respect to the total blood loss volume (WMD=30.92, P=0.31), drain blood loss (WMD=-  
5 34.53, P=0.50), postoperative Hb levels (WMD=-0.01, P=0.96), Hb decline (WMD=-0.39, P=0.08),  
6 LOS (WMD=0.15, P=0.38), transfusion rate (RR=1.08, P=0.75) and VTE occurrence (RR=1.89,  
7 P=0.15). Compared to the combined-delivery group, the single route group had significantly increased  
8 total blood loss volume (WMD=198.07, P<0.05), greater Hb decline (WMD=0.56, P<0.05) and higher  
9 transfusion rates (RR=2.51, P<0.05). However, no significant difference was noted in the drain blood  
10 loss, postoperative Hb levels, and VTE events between the two groups. The IV and topical routes had  
11 comparable efficacy and safety profiles.  
12  
13  
14  
15  
16  
17

18  
19 **Conclusions:** The combination of IV and topical TXA was relatively more effective in controlling  
20 bleeding without increased risk of VTE.  
21  
22  
23  
24  
25  
26  
27  
28  
29  
30  
31  
32  
33  
34  
35  
36  
37  
38  
39  
40  
41  
42  
43  
44  
45  
46  
47  
48  
49  
50  
51  
52  
53  
54  
55  
56  
57  
58  
59  
60

---

## STRENGTHS AND LIMITATIONS OF THIS STUDY

1. All included studies used the randomised controlled design to avoid uncontrolled biases.
2. The combination of topical and systemic TXA administration was also studied.
3. The heterogeneity was assessed using sensitivity, subgroup and meta-regression analyses.
4. The number of participants in most of the included studies was small, and the prevalence of VTE following joint replacement was low.
5. Only a small number of trials evaluated the combined-delivery group, which precluded sufficient exploration of heterogeneity through subgroup or meta-regression analysis.

**Keywords:** tranexamic acid; total knee arthroplasty; total hip arthroplasty; IV; topical; meta-analysis



## INTRODUCTION

Tranexamic acid (TXA) is a synthetic derivative of the amino acid lysine, which inhibits fibrinolysis by blocking the lysine-binding site of plasminogen.[1] Currently, it is one of the most commonly used haemostatic drugs and is capable of reducing blood loss volume in surgical patients by approximately 34%.[2,3] Moreover, this drug has effectively reduced the blood loss volume and transfusion rate in various surgical settings, including in traumatic haemorrhage,[4] caesarean section,[5] endoscopic sinus[6] and cardiac[7] surgeries and arthroplasty.[8]

Total knee arthroplasty (TKA) and total hip arthroplasty (THA) are reliable surgical procedures for patients suffering from moderate to severe degenerative joint diseases. Total joint arthroplasty (TJA) is effective in relieving pain, restoring physical function, and improving health-related quality of life.[9] By 2030, the demand for primary THA is estimated to increase to 572,000 and that for primary TKA is estimated to reach 3.48 million procedures.[10] Despite substantial advances in surgical and anaesthetic techniques, TKA and THA are still associated with a large amount of perioperative blood loss.[11] The intraoperative blood loss volume in either procedure is generally between 500 and 1,500 mL. Additionally, patients may experience a postoperative drop in haemoglobin level between 1 and 3 g/dL.[12] Up to 50% of the patients undergoing TJA inevitably experience postoperative anaemia.[11]

The role of TXA during arthroplasty has been an issue of concern for the past two decades. Several

1  
2  
3 previous trials or meta-analyses have mainly focused on comparing TXA and non-TXA, proving that  
4 oral, intravenous (IV) and topical TXA were associated with significantly reduced perioperative blood  
5 loss volume and blood transfusion requirements.[13-19] Furthermore, two important meta-analysis  
6 showed comparable haemostatic effects between oral and IV TXA.[20-21] Moreover, another two  
7 studies showed that patients who received combined IV and topical TXA experienced more benefit  
8 than those with single-route TXA administration.[22-23] However, few studies have directly compared  
9 the different TXA administration routes, and they were limited due to combination of various study  
10 design types and relatively small number of included studies.[24] In addition, the potential for  
11 thromboembolic events [deep vein thromboembolism (DVT) or pulmonary embolism (PE)] after TXA  
12 use represents TXA's Achilles' heel.[1] Topical TXA application during arthroplasty may be a safer  
13 route than the systemic method, which may reduce postoperative haemorrhage without causing  
14 hypercoagulation. Notably, the topical route has been shown to be a cost-effective and convenient route  
15 for TXA administration during dental, cardiac and spinal surgeries.[25] Several relevant trials have  
16 been published recently. Thus, we compiled this systematic review and meta-analysis to compare the  
17 efficacy and safety of topical and IV TXA use in patients undergoing TKA and TXA. In addition, the  
18 combination of topical and systemic administration of TXA was evaluated.  
19  
20  
21  
22  
23  
24  
25  
26  
27  
28  
29  
30  
31  
32  
33

## 34 **METHODS**

### 35 **Patient and public involvement**

36 No patients were involved in the study design or conduct of the study.  
37  
38

### 39 **Search strategy**

40  
41 This review was conducted according to the Preferred Reporting Items for Systematic Reviews and  
42 Meta-Analysis statement issued in 2009.[26] Ethical approval was not necessary for this study, as only  
43 de-identified pooled data from individual studies were analysed. We searched the PubMed, Embase  
44 and Cochrane CENTRAL databases for relevant studies from the time of these databases' inception to  
45 April 2018. The following groups of keywords and medical terms were used for the literature search:  
46 'tranexamic acid' and 'total knee arthroplasty', 'total knee replacement', 'total hip arthroplasty', 'total  
47 hip replacement' or 'arthroplasty' and random\*, prospective\* or trial\*. The details of the search  
48  
49  
50  
51  
52  
53  
54  
55  
56  
57  
58  
59  
60

strategy in PubMed are shown in supplementary file 1. This study was restricted to the English language. Furthermore, an additional search was conducted by screening the references of eligible studies.

### **Selection of studies**

Studies were pooled for meta-analysis if they met the following criteria: (1) Study design: randomised controlled trials (RCTs), (2) Patients: those with TKA or THA, (3) Intervention and control: comparing IV TXA with topical TXA or considering their combination with single TXA regimen and (4) Outcomes: the main outcomes included intraoperative and total blood loss, transfusion rate, low postoperative haemoglobin (Hb) level and postoperative Hb decline. However, the secondary outcomes included length of hospital stay (LOS) and/or the occurrence of venous thromboembolism (VTE) which may present as PE or DVT.

### **Data collection and quality assessment**

Two reviewers independently evaluated the eligibility of the collected studies and extracted their data. Any discrepancy was resolved via a consensus meeting. The full text of the eligible studies was reviewed, and information were entered into an electronic database, including author, year of publication, region, sample size, patient characteristics (e.g. age, gender, surgery type), IV and topical regimen, transfusion threshold, tourniquet use, thromboembolism prophylaxis and outcomes. The Jadad scale was used for the quality assessment of RCTs,[27] which assigned a score of 0 to 5 according to the items of randomisation, blinding, and withdrawals reported during the study period.

### **Statistical analysis**

All meta-analyses were conducted using Stata 12.0 (StataCorp LLC, College Station, TX, USA). The relative risk (RR) and 95% confidence interval (CI) were used as estimates to analyse dichotomous outcomes. The weighted mean differences (WMD) were used for continuous data and 95% CI was used for estimates. We converted the median to mean following Hozo's method.[28] The random effects model was used for data processing. In addition, statistical heterogeneity among the studies was assessed by using the Cochran's Q statistic and was quantified according to the  $I^2$  statistics. We considered the low, moderate, and high heterogeneity as  $I^2$  values of  $\leq 25\%$ , 25–75% and  $\geq 75\%$ , respectively.[29] Sensitivity analysis was performed by removing one trial at a time to determine its

1  
2  
3 influence on the overall result. Subgroup analysis was further performed according to the following  
4 variables: surgery (THA or TKA), region (Asia, North America or Europe), IV dose ( $\geq 2$  g or  $< 2$  g),  
5 topical dose ( $\geq 2$  g or  $< 2$  g) and transfusion protocol (strict or loose). The TXA dose of 30 mg/kg was  
6 categorised into the subgroup  $\geq 2$  g. A strict transfusion protocol was implemented for the threshold of  
7 Hb  $< 8$  g/dL. When more than ten studies were available for certain outcomes, meta-regression analysis  
8 was performed to examine the impact of the sample size. A funnel plot was constructed to visually  
9 evaluate the publication bias. The Egger's and Begg's tests were used for quantitative assessment of  
10 publication bias.[30,31] A P-value  $< 0.05$  was considered statistically significant.  
11  
12  
13  
14  
15  
16  
17  
18  
19

## 20 RESULTS

21  
22 Fig. 1 shows the flow diagram of the study selection process. After step-by-step exclusion, 26 RCTs  
23 were finally included. One trial had three comparison arms of IV and topical TXA and their  
24 combination.[32] Tables 1 and 2 show the main features of the trials. We identified 20 RCTs  
25 comparing IV TXA with topical TXA, with a total of 1,912 participants (Table 1).[32-51] About 15  
26 trials used TXA in TKA procedures and five trials used TXA in THA procedures. Only one TKA study  
27 did not use a tourniquet during surgery.[49] Ten trials were conducted in Asia, seven in Europe and  
28 three in the United States. The patients' mean age ranged from 44 to 73 years. Seventeen trials  
29 presented a thromboprophylaxis protocol, with low-molecular-weight heparin used most frequently.  
30 Seven RCTs compared single-route administration (IV or intra-articular) with a combination of IV and  
31 topical routes[32,52-57] (Table 2), with a total of 877 patients. Most of the studies (5/7) were  
32 conducted in the Chinese population. Four studies were conducted on patients who underwent TKA,  
33 whereas three studies were performed among those with THA. For the arm of single route, five trials  
34 used the IV route, one used the topical route, and one used both. All studies implemented a  
35 thromboprophylaxis protocol. With regards to the TKA studies, only Nielsen et al. did not use an  
36 intraoperative tourniquet.[55] The quality assessment of the selected trials using the Jadad scale is  
37 shown in Supplemental Table 1, and the total score of the included trials is presented in Tables 1 and 2.  
38 The total score ranged from 1 to 5, with a mean score of 3.7. The items related to blinding were least  
39 satisfied.  
40  
41  
42  
43  
44  
45  
46  
47  
48  
49  
50  
51  
52  
53

## 54 IV versus topical route

## Blood loss

About 14 studies reported on blood loss. No significant difference was observed in the total blood loss volume (WMD=30.92, 95% CI -28.40-90.25, P=0.31; I<sup>2</sup>=87.0%, P<0.05) between IV TXA administration and topical administration. This effect was not substantially different for either TKA (WMD=52.69, 95% CI=-18.58-123.97, P=0.15) or THA (WMD=-31.03, 95% CI=-156.16-94.10, P=0.63) (Fig. 2).

Subgroup analysis showed that region (Asia, Europe or USA), IV dose ( $\geq 2$  g or  $< 2$  g), or topical dose ( $\geq 2$  g or  $< 2$  g) did not markedly affected the overall effect of the analysis (all P>0.05). None of the studies that significantly changed the overall effect in the sensitivity analysis was identified. Meta-regression demonstrated that the sample size did not account for the heterogeneity of the study (P=0.20). The funnel plot appeared to be symmetrical. No publication bias was revealed based on the Egger's (P=0.37) or Begg's test (P=0.27).

Eight studies presented the outcome of drain blood loss. No significant difference was demonstrated in the IV route (WMD=-34.53, 95% CI=-135.39-66.34, P=0.50; I<sup>2</sup>=97.2%, P<0.05) and overall effect on TKA (WMD=-38.28, 95% CI=-146.29-69.73, P=0.49) or THA (WMD=-7.50, 95% CI=-95.00-80.00, P=0.87).

## Postoperative Hb

By pooling data from 14 relevant studies, no significant difference was found between the IV and topical routes of TXA administration with respect to the postoperative Hb level (WMD=-0.01, 95% CI=-0.23-0.22, P=0.96; I<sup>2</sup>=80.5%, P<0.05). The result remained insignificant for TKA (WMD=-0.00, 95% CI=-0.25-0.25, P=0.99) and THA (WMD=-0.03, 95% CI=-0.76-0.70, P=0.94) (Fig. 3). When stratified according to the region and IV and topical dose, no significant data were noted in any subgroup (all P>0.05). Sensitivity analysis was performed by excluding studies one at a time; however, no significant difference was noted. The significant role of the sample size in explaining the heterogeneity (P=0.27) was not revealed in the meta-regression analysis. The funnel plot was symmetrical, and no bias was shown based on the Egger's (P=0.38) or Begg's test (P=0.91).

Seven studies reported a decline in Hb levels after arthroplasty. The pooled data revealed no significant difference in the IV route compared to the topical route (WMD=-0.39, 95% CI=-0.82-0.04, P=0.08;

1  
2  
3  $I^2=89.4\%$ ,  $P<0.05$ ). In the subgroup analysis, two studies on THA showed that the IV route had a  
4 significantly lesser amount of Hb decline than the topical route (WMD=-0.49, 95% CI=-0.70–0.28,  
5  $P<0.05$ ). However, no statistical significance was noted on the TKA procedure (WMD=-0.35, 95%  
6 CI=-1.02–0.32,  $P=0.31$ ). When excluding the studies by Soni et al. or Tzatzairis et al., [38,49] the  
7 overall effect was significant ( $P<0.05$ ).  
8  
9

## 10 11 12 Transfusion rate

13  
14  
15 Information on the transfusion rate was reported in 17 studies. The pooled results demonstrated that no  
16 significant difference was observed in the transfusion rate of the IV route (RR=1.08, 95% CI=0.78–  
17 1.50,  $P=0.75$ ). No heterogeneity was detected ( $I^2=0\%$ ,  $P=0.63$ ). In a separate analysis completed  
18 according to different arthroplasty procedures, the result was not substantially altered (TKA: RR=1.25,  
19 95% CI=0.80–1.96,  $P=0.32$ ; THA: RR=0.80, 95% CI=0.46–1.37,  $P=0.41$ ) (Fig. 4). When stratified  
20 according to the transfusion threshold (i.e. loose or strict), no significant result was shown in any  
21 subgroup (loose: RR=1.13,  $P=0.65$ ; strict: RR=1.00,  $P=1.00$ ). Similarly, no substantially significant  
22 results were noted in the subgroups based on the region and IV or topical dose (all  $P>0.05$ ). The  
23 sensitivity analysis did not show that the inclusion of any individual study significantly changed the  
24 overall effect. The sample size was not the source of heterogeneity in meta-regression analysis  
25 ( $P=0.36$ ). The funnel plot was symmetrical. No publication bias was shown based on the Egger's  
26 ( $P=0.69$ ) or Begg's test ( $P=1.00$ ).  
27  
28  
29  
30  
31  
32  
33  
34  
35

## 36 37 LOS

38  
39 The LOS was reported in seven studies. One study was excluded due to zero standard deviation.[49]  
40 The pooled results showed that patients with the IV and topical routes had similar LOS (WMD=0.15,  
41 95% CI=-0.18–0.47,  $P=0.38$ ;  $I^2=90.1\%$ ,  $P<0.05$ ). No marked change was revealed for TKA  
42 (WMD=0.27, 95% CI=-0.01–0.54,  $P=0.06$ ) or THA (WMD=-0.05, 95% CI=-0.42–0.32,  $P=0.80$ ).  
43  
44  
45

## 46 47 VTE events

48  
49 A total of 20 studies reported VTE events. However, 11 trials showed no VTE occurrence in any study  
50 group[36-40,42-46,49] and thus, were excluded from meta-analysis. For the remaining nine trials,  
51 except for one study,[34] low molecular weight heparin was unanimously used for  
52 thromboprophylaxis. The aggregated data showed no significant difference for the IV versus topical  
53  
54  
55  
56  
57  
58  
59  
60

route (RR=1.89, 95% CI=0.79–4.55, P=0.15). No heterogeneity was detected ( $I^2=0\%$ , P=0.90). The pooled results remained non-significant for TKA (RR=2.14, 95% CI=0.74–6.18, P=0.16) and THA (RR=1.45, 95% CI=0.30–6.93, P=0.64) (Fig. 5). No single study played a substantial role in sensitivity analysis. Sample size was not the source of heterogeneity in meta-regression analysis (P=0.74).

### Combined routes versus single route

#### Blood loss

The pooled data showed that the single route had significant increased total blood loss volume (WMD=198.07, 95% CI=88.46–307.67, P<0.05;  $I^2=92.3\%$ ) compared with the combined regimen. When stratified according to different procedures, the results remained significant for TKA (WMD=168.34, 95% CI=85.44–251.25, P<0.05;  $I^2=59.4\%$ ) and THA (WMD=210.36, 95% CI=13.34–407.39, P<0.05;  $I^2=96.3\%$ ) (Fig. 6). Either the IV (WMD=228.93, P<0.05) or topical route (WMD=108.80, P<0.05) showed significantly increased total blood loss volume. Only two studies reported data on drain blood loss,[52,56] and their pooled results showed no significant difference between single-route and combined regimen (WMD=109.51, 95% CI=-34.73–253.74, P=0.14;  $I^2=98.1\%$ , P<0.05).

#### Hb level

Three studies presented the postoperative Hb levels, including two on TKA[53,55] and one on THA.[57] No significant difference was noted on the single route compared with the combined routes (WMD=-0.28, 95% CI=-1.30–0.74, P=0.59;  $I^2=89.6\%$ , P<0.05). Six studies presented the outcome of Hb decline following surgery. The single route had a significantly greater magnitude of Hb decline than the combined method (WMD=0.56, 95% CI=0.30–0.81, P<0.05;  $I^2=85.2\%$ , P<0.05). The result remained significant for studies on both TKA (WMD=0.44, P<0.05) and THA (WMD=0.67, P<0.05).

#### Transfusion rate

Seven studies were eligible, including four studies on TKA[52-55] and three studies on THA.[32,56,57] Xie et al. reported the use of both IV and topical TXA administration.[32] The single route had a significantly higher transfusion rate than the combined group (RR=2.51, 95% CI=1.48–4.25, P<0.05). No heterogeneity was shown ( $I^2=0\%$ ). This trend remained significant for studies on TKA (RR=0.09, P<0.05) and THA (RR=2.66, P<0.05) (Fig. 7). The IV route still showed a markedly

1  
2  
3 higher transfusion rate than the combination group (RR=2.39, 95% CI=1.38–4.11, P<0.05). However, a  
4 significantly higher transfusion rate (RR=5.45, 95% CI=0.64–46.42, P=0.12) was not observed in two  
5 studies that used the topical route.  
6  
7

## 8 LOS

9  
10  
11 Four studies were relevant in terms of evaluating the LOS,[32,52,55,56] and Xie et al. presented on  
12 both IV and topical routes.[32] The LOS did not differ significantly between the single route and  
13 combination regimen (WMD=0.09, 95% CI=-0.10–0.28, P=0.36;  $I^2=45.8\%$ , P=0.12). No significant  
14 difference was noted in the LOS of patients who underwent TKA or THA (both P>0.05). The result  
15 remained non-significant (WMD=0.14, P=0.22) as reported in four studies conducting IV TXA  
16 administration.  
17  
18  
19  
20  
21

## 22 VTE events

23  
24  
25 Six studies were eligible for consideration of VTE events.[32,52-54,56,57] One study showed zero  
26 events for both arms,<sup>53</sup> and one study presented both IV and topical routes.[32] The pooled data  
27 suggested that the risk of VTE events did not differ substantially between the single and combination  
28 routes (RR=0.80, 95% CI=0.27–2.35, P=0.68;  $I^2=0\%$ ). No statistical significance was shown between  
29 the different types of arthroplasty (TKA: RR=2.98, P=0.34; and THA: RR=0.54, P=0.32) (Fig. 8) or  
30 different single-delivery routes (IV: RR=0.98, P=0.97; topical: RR=0.20, P=0.30).  
31  
32  
33  
34  
35  
36  
37  
38

## 39 DISCUSSION

40  
41 In recent history, TXA is one of the most commonly used haemostatic drug for reducing blood loss  
42 during total joint replacement and ensuring fast postoperative recovery. To our knowledge, this is the  
43 most comprehensive meta-analysis of updated randomised trials investigating the efficacy and safety of  
44 IV versus topical TXA in patients undergoing TKA and THA. We found that the IV and topical routes  
45 did not differ substantially for the outcomes of total blood loss, drain blood loss, postoperative Hb  
46 level, postoperative Hb decline, transfusion rate, and/or LOS. The incidence of VTE was low for both  
47 studied arms. The two routes appeared to be of comparable safety profiles for patients undergoing  
48 arthroplasty. Except for two THA studies showing that the IV route resulted in a lesser magnitude of  
49 Hb decline, the overall effect remained insignificant for the majority of subgroups stratified based on  
50  
51  
52  
53  
54  
55  
56  
57  
58  
59  
60



1  
2  
3 THA or TKA. When comparing the combination regimen with the single route, our meta-analysis  
4 demonstrated that the combination of IV and topical routes could significantly decrease the total blood  
5 loss volume and reduce transfusion requirements. A relatively lesser degree of Hb decline was revealed  
6 in the combined-delivery regimen. LOS was similar for both arms. Overall, VTE events occurred rarely  
7 for both routes, and no marked difference was revealed when comparing the combination and single  
8 route groups.  
9  
10  
11  
12

13  
14 Following IV administration, TXA is spread in the extracellular and intracellular compartments. It  
15 rapidly diffuses into the synovial fluid until its concentration reaches to that of the serum. The  
16 biological half-life is three hours in the joint fluid, and 90% of TXA is eliminated within 24 hours after  
17 administration.[58] For the intra-articular route, TXA administration could provide a maximum local  
18 dose at the site where needed. Local administration of TXA inhibits fibrin dissolution and induces  
19 partial microvascular haemostasis.[59] Particularly, the release of the tourniquet always causes  
20 increased fibrinolysis, which can be attenuated by topical TXA.[60] Compared with the IV route, the  
21 systemic absorption for local use is at a substantially lower level.[61] Additionally, topical TXA could  
22 be safer than IV TXA in patients with renal impairment.[41] Moreover, the antifibrinolytic effect of  
23 topical TXA is limited to postoperative bleeding. Preoperatively, IV TXA was associated with lower  
24 blood loss volume during arthroplasty, which explains the greater benefit of combined regimen of  
25 using IV along with topical routes.[62]  
26  
27  
28  
29  
30  
31  
32  
33  
34

35  
36 Several meta-analyses have been published on TXA use during arthroplasty. Both IV and intra-articular  
37 administration of TXA have been demonstrated to reduce the blood loss volume without increased risk  
38 of thromboembolic complications, and the use of IV TXA is considerably more common.[13,14,16,21-  
39 24,63-68] However, most of these meta-analyses compared TXA with a placebo. We only identified  
40 two meta-analyses that performed a head-to-head comparison between the topical and IV routes,  
41 including one on TKA[24] and the other on THA.[61] Both analyses included only a very small  
42 number of studies. In addition, a methodological flaw was observed because they included non-  
43 randomised or retrospective studies.  
44  
45  
46  
47  
48  
49

50  
51 Our meta-analysis has several apparent strengths. First, all included studies were RCTs. The number of  
52 included trials was also larger in our meta-analysis than that in other meta-analyses, which increased  
53 the statistical power. All relevant trials published during the past two years were analysed. In addition,  
54 we investigated the efficacy of the combination of topical and IV routes. Given the similar mechanism  
55  
56  
57  
58  
59  
60

1  
2  
3 of TXA administration in both TKA and THA, both procedures were considered for this meta-analysis.

4  
5 Several clinical variables may influence the efficacy of TXA. The optimal dose of TXA remained  
6 controversial. When topically applied, there was no difference in the efficacy of 1.5 g versus 3 g of  
7 TXA wash in reducing perioperative blood loss.[69] However, a meta-analysis of seven trials  
8 suggested that a higher dose of TXA ( $>2$  g), but not a low dose, was correlated with significantly  
9 reduced transfusion requirements.[15] In our subgroups stratified based on the high ( $\geq 2$  g) and low  
10 doses ( $<2$  g), no significant difference was observed between the doses and most outcomes. In fact, the  
11 effect on blood loss reduction between low- and high-dose TXA may be explained by the ‘tissue  
12 contact time’— the time when TXA is applied on the joint bed.[70] At least five minutes of contact  
13 time was allowed before TXA was suctioned from the wound to allow for the repair of the  
14 retinaculum.[44] Sa-Ngasoongsong et al. suggested that prolonging the contact time could enhance the  
15 effects of low-dose TXA.[70]

16  
17 We were aware of several limitations with respect to this meta-analysis. The number of participants in  
18 most of the included studies was small. As the prevalence of VTE was low following joint replacement,  
19 trials with a larger sample size were further needed to increase the statistical power. Only a small  
20 number of trials evaluated the combined-delivery group, which precluded sufficient exploration of  
21 heterogeneity through subgroup or meta-regression analysis. Additionally, many included trials had  
22 methodological deficits, such as the description of the randomisation process, blinded assessment  
23 and/or explanation of withdrawal and dropouts. Several studied outcomes have been criticised for their  
24 inaccuracy. For example, drains may not be suitable for the measurement of blood loss volume, as the  
25 haematocrit in the drain output declined over time and drains may increase the blood loss. The existing  
26 literature provided variable and heterogeneous information with respect to the clinical features. For  
27 instance, the estimated blood loss, timing of Hb measurement and indications for blood transfusion  
28 were not standardised among various trials. Several studies used tourniquet to facilitate the arthroplasty  
29 procedure, which may adversely impact the efficacy of intraoperative IV TXA.[44] A meta-analysis  
30 showed that the use of a tourniquet was associated with increased risk for vein thrombosis.[71]  
31 Intraoperative hypotension or hypertension may affect the blood loss volume, whereas related  
32 information was unclear in most included trials. Additionally, LOS may be further affected by the  
33 patients’ age, surgical experience, and/or infection complications. We speculated that these  
34 confounding factors were balanced between different comparison groups due to the randomised design.

1  
2  
3 Not searching grey literature and articles in other languages might have also skewed the results.  
4 Finally, high heterogeneity was observed in places that might limit the ability to make strong inferences.  
5  
6

## 7 **CONCLUSIONS**

8

9 Our meta-analysis showed that IV and topical TXA had comparable efficacy and safety profiles. The  
10 combined delivery method using IV and topical TXA may be the most effective strategy that can be  
11 used while maintaining patient safety.  
12  
13  
14  
15  
16  
17  
18  
19  
20  
21  
22  
23  
24  
25

## 26 **ACKNOWLEDGMENTS**

27

## 28 **FUNDING**

29

30 This research received no specific grant from any funding agency in the public, commercial or not-for-  
31 profit sectors.  
32  
33  
34  
35  
36  
37

## 38 **CONFLICTS OF INTEREST STATEMENT**

39

40 The authors declare no conflicts of interest.  
41  
42  
43

## 44 **AUTHOR CONTRIBUTIONS**

45

46 SQ and LJ contributed to the conception and design of the study. SQ, LJ, CJ, ZC, LC, and JY  
47 contributed to data acquisition or analysis and interpretation. SQ and LJ were involved in drafting the  
48 manuscript or revising it critically for important intellectual content. All authors have given final  
49 approval of the version to be published.  
50  
51  
52  
53  
54  
55  
56  
57  
58  
59  
60

---

## DATA SHARING STATEMENT

No additional data are available.

## References

1. Dunn CJ, Goa KL. Tranexamic acid: a review of its use in surgery and other indications. *Drugs* 1999; 57: 1005-1032.
2. Henry DA, Carless PA, Moxey AJ, et al. Anti-fibrinolytic use for minimising perioperative allogeneic blood transfusion. *Cochrane Database Syst Rev* 2011; 19: CD001886.
3. Ker K, Prieto-Merino D, Roberts I. Systematic review, meta-analysis and meta-regression of the effect of tranexamic acid on surgical blood loss. *Br J Surg* 2013; 100: 1271-1279.
4. Roberts I, Shakur H, Afolabi A, et al. The importance of early treatment with tranexamic acid in bleeding trauma patients: an exploratory analysis of the CRASH-2 randomised controlled trial. *Lancet* 2011; 377: 1096-1101, 1101 e1091-1092.
5. Simonazzi G, Bisulli M, Saccone G, et al. Tranexamic acid for preventing postpartum blood loss after cesarean delivery: a systematic review and meta-analysis of randomized controlled trials. *Acta Obstet Gynecol Scand* 2016; 95: 28-37.
6. Pundir V, Pundir J, Georgalas C, Fokkens WJ. Role of tranexamic acid in endoscopic sinus surgery - a systematic review and meta-analysis. *Rhinology* 2013; 51: 291-297.
7. Adler Ma SC, Brindle W, Burton G, et al. Tranexamic acid is associated with less blood transfusion in off-pump coronary artery bypass graft surgery: a systematic review and meta-analysis. *J Cardiothorac Vasc Anesth* 2011; 25: 26-35.
8. Yang ZG, Chen WP, Wu LD. Effectiveness and safety of tranexamic acid in reducing blood loss in total knee arthroplasty: a meta-analysis. *J Bone Joint Surg Am* 2012; 94: 1153-1159.
9. Ethgen O, Bruyere O, Richy F, Dardennes C, Reginster JY. Health-related quality of life in total hip and total knee arthroplasty. A qualitative and systematic review of the literature. *J Bone Joint Surg Am* 2004; 86-A: 963-974.

10. Kurtz S, Ong K, Lau E, Mowat F, Halpern M. Projections of primary and revision hip and knee arthroplasty in the United States from 2005 to 2030. *J Bone Joint Surg Am* 2007; 89: 780-785.
11. Rasouli MR, Maltenfort MG, Erkocak OF, Austin MS, Waters JH, Parvizi J. Blood management after total joint arthroplasty in the United States: 19-year trend analysis. *Transfusion* 2016; 56: 1112-1120.
12. Sculco TP, Baldini A, Keating EM. Blood management in total joint arthroplasty. *Instr Course Lect* 2005; 54: 51-66.
13. Yue C, Pei F, Yang P, Xie J, Kang P. Effect of Topical Tranexamic Acid in Reducing Bleeding and Transfusions in TKA. *Orthopedics* 2015; 38: 315-324.
14. Wang H, Shen B, Zeng Y. Blood Loss and Transfusion After Topical Tranexamic Acid Administration in Primary Total Knee Arthroplasty. *Orthopedics* 2015; 38: e1007-1016.
15. Panteli M, Papakostidis C, Dahabreh Z, Giannoudis PV. Topical tranexamic acid in total knee replacement: a systematic review and meta-analysis. *Knee* 2013; 20: 300-309.
16. Gao F, Ma J, Sun W, Guo W, Li Z, Wang W. Topical fibrin sealant versus intravenous tranexamic acid for reducing blood loss following total knee arthroplasty: A systematic review and meta-analysis. *Int J Surg* 2016; 32: 31-37.
17. Liu Q, Geng P, Shi L, Wang Q, Wang P. Tranexamic acid versus aminocaproic acid for blood management after total knee and total hip arthroplasty: A systematic review and meta-analysis. *Int J Surg* 2018;54:105-112.
18. Zhu J, Zhu Y, Lei P, Zeng M, Su W, Hu Y. Efficacy and safety of tranexamic acid in total hip replacement: A PRISMA-compliant meta-analysis of 25 randomized controlled trials. *Medicine (Baltimore)* 2017;96:e9552.
19. Zhang LK, Ma JX, Kuang MJ, et al. The efficacy of tranexamic acid using oral administration in total knee arthroplasty: a systematic review and meta-analysis. *J Orthop Surg Res* 2017;12:159.
20. Li GL, Li YM. Oral tranexamic acid can reduce blood loss after total knee and hip arthroplasty: A meta-analysis. *Int J Surg* 2017;46:27-36.

21. Zhang LK, Ma JX, Kuang MJ, et al. Comparison of oral versus intravenous application of tranexamic acid in total knee and hip arthroplasty: A systematic review and meta-analysis. *Int J Surg* 2017;45:77-84.
22. Wang Z, Shen X. The efficacy of combined intra-articular and intravenous tranexamic acid for blood loss in primary total knee arthroplasty: A meta-analysis. *Medicine (Baltimore)* 2017;96: e8123.
23. Yang L, Du S, Sun Y. Is combined topical and intravenous tranexamic acid superior to single use of tranexamic acid in total joint arthroplasty?: A meta-analysis from randomized controlled trials. *Medicine (Baltimore)* 2017;96:e7609.
24. Wang H, Shen B, Zeng Y. Comparison of topical versus intravenous tranexamic acid in primary total knee arthroplasty: a meta-analysis of randomized controlled and prospective cohort trials. *Knee* 2014; 21: 987-993.
25. Guzel Y, Gurcan OT, Golge UH, et al. Topical tranexamic acid versus autotransfusion after total knee arthroplasty. *J Orthop Surg (Hong Kong)*. 2016;24:179-82.
26. Moher D, Liberati A, Tetzlaff J, Altman DG. Preferred reporting items for systematic reviews and meta-analyses: the PRISMA statement. *PLoS Med* 2009; 6: e1000097.
27. Jadad AR, Moore RA, Carroll D, et al. Assessing the quality of reports of randomized clinical trials: is blinding necessary? *Control Clin Trials* 1996; 17: 1-12.
28. Hozo SP, Djulbegovic B, Hozo I. Estimating the mean and variance from the median, range, and the size of a sample. *BMC Med Res Methodol* 2005; 5: 13.
29. Higgins JP, Thompson SG, Deeks JJ, Altman DG. Measuring inconsistency in meta-analyses. *BMJ* 2003; 327: 557-560.
30. Begg CB, Mazumdar M. Operating characteristics of a rank correlation test for publication bias. *Biometrics* 1994; 50: 1088-1101.
31. Egger M, Davey Smith G, Schneider M, Minder C. Bias in meta-analysis detected by a simple, graphical test. *BMJ* 1997; 315: 629-634.
32. Xie J, Ma J, Yue C, Kang P, Pei F. Combined use of intravenous and topical tranexamic acid

1  
2  
3 following cementless total hip arthroplasty: a randomised clinical trial. *Hip Int* 2016; 26: 36-42.

4  
5 33. Maniar RN, Kumar G, Singhi T, Nayak RM, Maniar PR. Most effective regimen of tranexamic acid  
6 in knee arthroplasty: a prospective randomized controlled study in 240 patients. *Clin Orthop Relat Res*  
7 2012; 470: 2605-2612.

8  
9  
10  
11 34. Seo JG, Moon YW, Park SH, Kim SM, Ko KR. The comparative efficacies of intra-articular and IV  
12 tranexamic acid for reducing blood loss during total knee arthroplasty. *Knee Surg Sports Traumatol*  
13 *Arthrosc* 2013; 21: 1869-1874.

14  
15  
16  
17 35. Gomez-Barrena E, Ortega-Andreu M, Padilla-Eguiluz NG, Perez-Chrzanowska H, Figueredo-Zalve  
18 R. Topical intra-articular compared with intravenous tranexamic acid to reduce blood loss in primary  
19 total knee replacement: a double-blind, randomized, controlled, noninferiority clinical trial. *J Bone*  
20 *Joint Surg Am* 2014; 96: 1937-1944.

21  
22  
23  
24 36. Patel JN, Spanyer JM, Smith LS, Huang J, Yakkanti MR, Malkani AL. Comparison of intravenous  
25 versus topical tranexamic acid in total knee arthroplasty: a prospective randomized study. *J*  
26 *Arthroplasty* 2014; 29: 1528-1531.

27  
28  
29  
30 37. Sarzaeem MM, Razi M, Kazemian G, Moghaddam ME, Rasi AM, Karimi M. Comparing efficacy  
31 of three methods of tranexamic acid administration in reducing hemoglobin drop following total knee  
32 arthroplasty. *J Arthroplasty* 2014; 29: 1521-1524.

33  
34  
35  
36 38. Soni A, Saini R, Gulati A, Paul R, Bhatti S, Rajoli SR. Comparison between intravenous and intra-  
37 articular regimens of tranexamic acid in reducing blood loss during total knee arthroplasty. *J*  
38 *Arthroplasty* 2014; 29: 1525-1527.

39  
40  
41  
42 39. Wei W, Wei B. Comparison of topical and intravenous tranexamic acid on blood loss and  
43 transfusion rates in total hip arthroplasty. *J Arthroplasty* 2014; 29: 2113-2116.

44  
45  
46  
47 40. Aguilera X, Martinez-Zapata MJ, Hinarejos P, et al. Topical and intravenous tranexamic acid  
48 reduce blood loss compared to routine hemostasis in total knee arthroplasty: a multicenter, randomized,  
49 controlled trial. *Arch Orthop Trauma Surg* 2015; 135: 1017-1025.

50  
51  
52  
53 41. Digas G, Koutsogiannis I, Meletiadis G, Antonopoulou E, Karamoulas V, Bikos Ch. Intra-articular  
54 injection of tranexamic acid reduce blood loss in cemented total knee arthroplasty. *Eur J Orthop Surg*  
55

1  
2  
3 Traumatol 2015; 25: 1181-1188.

4  
5 42. Oztas S, Ozturk A, Akalin Y, et al. The effect of local and systemic application of tranexamic acid  
6 on the amount of blood loss and allogeneic blood transfusion after total knee replacement. Acta Orthop  
7 Belg 2015; 81: 698-707.

8  
9  
10  
11 43. Aggarwal AK, Singh N, Sudesh P. Topical vs Intravenous Tranexamic Acid in Reducing Blood  
12 Loss After Bilateral Total Knee Arthroplasty: A Prospective Study. J Arthroplasty 2016; 31: 1442-  
13 1448.

14  
15  
16  
17 44. Chen JY, Chin PL, Moo IH, et al. Intravenous versus intra-articular tranexamic acid in total knee  
18 arthroplasty: A double-blinded randomised controlled noninferiority trial. Knee 2016; 23: 152-156.

19  
20  
21  
22 45. Drosos GI, Ververidis A, Valkanis C, et al. A randomized comparative study of topical versus  
23 intravenous tranexamic acid administration in enhanced recovery after surgery (ERAS) total knee  
24 replacement. J Orthop 2016; 13: 127-131.

25  
26  
27  
28 46. Keyhani S, Esmailiejah AA, Abbasian MR, Safdari F. Which Route of Tranexamic Acid  
29 Administration is More Effective to Reduce Blood Loss Following Total Knee Arthroplasty? Arch  
30 Bone Jt Surg 2016; 4: 65-69.

31  
32  
33  
34 47. May JH, Rieser GR, Williams CG, Markert RJ, Bauman RD, Lawless MW. The Assessment of  
35 Blood Loss During Total Knee Arthroplasty When Comparing Intravenous vs Intracapsular  
36 Administration of Tranexamic Acid. J Arthroplasty 2016; 31: 2452-2457.

37  
38  
39  
40 48. North WT, Mehran N, Davis JJ, Silverton CD, Weir RM, Laker MW. Topical vs Intravenous  
41 Tranexamic Acid in Primary Total Hip Arthroplasty: A Double-Blind, Randomized Controlled Trial. J  
42 Arthroplasty 2016; 31: 1022-1026.

43  
44  
45  
46 49. Tzatzairis TK, Drosos GI, Kotsios SE, Ververidis AN, Vogiatzaki TD, Kazakos KI. Intravenous vs  
47 Topical Tranexamic Acid in Total Knee Arthroplasty Without Tourniquet Application: A Randomized  
48 Controlled Study. J Arthroplasty 2016; 31: 2465-2470.

49  
50  
51  
52 50. Ugurlu M, Aksekili MA, Caglar C, Yuksel K, Sahin E, Akyol M. Effect of Topical and  
53 Intravenously Applied Tranexamic Acid Compared to Control Group on Bleeding in Primary  
54 Unilateral Total Knee Arthroplasty. J Knee Surg 2017; 30: 152-157.



- 1  
2  
3 51. Zhang Y, Zhang L, Ma X, et al. What is the optimal approach for tranexamic acid application in  
4 patients with unilateral total hip arthroplasty? *Orthopade* 2016;45:616-21.  
5  
6
- 7 52. Huang Z, Ma J, Shen B, Pei F. Combination of intravenous and topical application of tranexamic  
8 acid in primary total knee arthroplasty: a prospective randomized controlled trial. *J Arthroplasty* 2014;  
9 29: 2342-2346.  
10  
11
- 12 53. Lin SY, Chen CH, Fu YC, Huang PJ, Chang JK, Huang HT. The efficacy of combined use of  
13 intraarticular and intravenous tranexamic acid on reducing blood loss and transfusion rate in total knee  
14 arthroplasty. *J Arthroplasty* 2015; 30: 776-780.  
15  
16
- 17 54. Jain NP, Nisthane PP, Shah NA. Combined Administration of Systemic and Topical Tranexamic  
18 Acid for Total Knee Arthroplasty: Can It Be a Better Regimen and Yet Safe? A Randomized  
19 Controlled Trial. *J Arthroplasty* 2016; 31: 542-547.  
20  
21
- 22 55. Nielsen CS, Jans O, Orsnes T, Foss NB, Troelsen A, Husted H. Combined Intra-Articular and  
23 Intravenous Tranexamic Acid Reduces Blood Loss in Total Knee Arthroplasty: A Randomized,  
24 Double-Blind, Placebo-Controlled Trial. *J Bone Joint Surg Am* 2016; 98: 835-841.  
25  
26
- 27 56. Wu YG, Zeng Y, Yang TM, Si HB, Cao F, Shen B. The Efficacy and Safety of Combination of  
28 Intravenous and Topical Tranexamic Acid in Revision Hip Arthroplasty: A Randomized, Controlled  
29 Trial. *J Arthroplasty* 2016;31:2548-2553.  
30  
31
- 32 57. Yi Z, Bin S, Jing Y, Zongke Z, Pengde K, Fuxing P. Tranexamic Acid Administration in Primary  
33 Total Hip Arthroplasty: A Randomized Controlled Trial of Intravenous Combined with Topical Versus  
34 Single-Dose Intravenous Administration. *J Bone Joint Surg Am* 2016;98: 983-991.  
35  
36
- 37 58. Nilsson IM. Clinical pharmacology of aminocaproic and tranexamic acids. *J Clin Pathol Suppl (R*  
38 *Coll Pathol)* 1980; 14: 41-47.  
39  
40
- 41 59. Sukeik M, Alshryda S, Haddad FS, Mason JM. Systematic review and meta-analysis of the use  
42 of tranexamic acid in total hip replacement. *J Bone Joint Surg Br* 2011;93:39-46.  
43  
44
- 45 60. Aglietti P, Baldini A, Vena LM, Abbate R, Fedi S, Falciani M. Effect of tourniquet use on activation  
46 of coagulation in total knee replacement. *Clin Orthop Relat Res* 2000; 371: 169-177.  
47  
48
- 49 61. Sun X, Dong Q, Zhang YG. Intravenous versus topical tranexamic acid in primary total hip  
50  
51  
52  
53  
54  
55  
56  
57  
58  
59  
60

1  
2  
3 replacement: A systemic review and meta-analysis. *Int J Surg* 2016;32:10-8.  
4

5  
6 62. Benoni G, Fredin H, Knebel R, Nilsson P. Blood conservation with tranexamic acid in total hip  
7 arthroplasty: a randomized, double-blind study in forty primary operations. *Acta Orthop Scand*.  
8 2001;72:442-8  
9

10  
11 63. Shemshaki H, Nourian SM, Nourian N, Dehghani M, Mokhtari M, Mazoochian F. One step closer  
12 to sparing total blood loss and transfusion rate in total knee arthroplasty: a meta-analysis of different  
13 methods of tranexamic acid administration. *Arch Orthop Trauma Surg* 2015; 135: 573-588.  
14  
15

16  
17 64. Wei Z, Liu M. The effectiveness and safety of tranexamic acid in total hip or knee arthroplasty: a  
18 meta-analysis of 2720 cases. *Transfus Med* 2015; 25: 151-162.  
19  
20

21  
22 65. Wu Q, Zhang HA, Liu SL, Meng T, Zhou X, Wang P. Is tranexamic acid clinically effective and  
23 safe to prevent blood loss in total knee arthroplasty? A meta-analysis of 34 randomized controlled  
24 trials. *Eur J Orthop Surg Traumatol* 2015; 25: 525-541.  
25  
26

27  
28 66. Yu X, Li W, Xu P, Liu J, Qiu Y, Zhu Y. Safety and Efficacy of Tranexamic Acid in Total Knee  
29 Arthroplasty. *Med Sci Monit* 2015; 21: 3095-3103.  
30  
31

32  
33 67. Chen S, Wu K, Kong G, Feng W, Deng Z, Wang H. The efficacy of topical tranexamic acid in total  
34 hip arthroplasty: a meta-analysis. *BMC Musculoskelet Disord* 2016; 17: 81.  
35

36  
37 68. Huang GP, Jia XF, Xiang Z, et al. Tranexamic Acid Reduces Hidden Blood Loss in Patients  
38 Undergoing Total Knee Arthroplasty: A Comparative Study and Meta-Analysis. *Med Sci Monit* 2016;  
39 22: 797-802.  
40  
41

42  
43 69. Wong J, Abrishami A, El Beheiry H, et al. Topical application of tranexamic acid reduces  
44 postoperative blood loss in total knee arthroplasty: a randomized, controlled trial. *J Bone Joint Surg*  
45 *Am* 2010; 92: 2503-2513.  
46  
47

48  
49 70. Sa-Ngasoongsong P, Wongsak S, Chanplakorn P, et al. Efficacy of low-dose intra-articular  
50 tranexamic acid in total knee replacement; a prospective triple-blinded randomized controlled trial.  
51 *BMC Musculoskelet Disord* 2013; 14: 340.  
52  
53

54  
55 71. Zhang W, Li N, Chen S, Tan Y, Al-Aidaros M, Chen L. The effects of a tourniquet used in total  
56 knee arthroplasty: a meta-analysis. *J Orthop Surg Res* 2014; 9: 13.  
57  
58

1  
2  
3  
4  
5  
6  
7  
8  
9  
10  
11  
12  
13  
14  
15  
16  
17  
18  
19  
20  
21  
22  
23  
24  
25  
26  
27  
28  
29  
30  
31  
32  
33  
34  
35  
36  
37  
38  
39  
40  
41  
42  
43  
44  
45  
46  
47  
48  
49  
50  
51  
52  
53  
54  
55  
56  
57  
58  
59  
60

---

For peer review only

---

1  
2  
3  
4  
5  
6  
7  
8  
9  
10  
11 **Figure legends:**

12  
13 Figure 1. The flowdiagram showing the study selection process.

14  
15  
16 Figure 2. Forest plot comparing the efficacy of intravenous versus topical TXA on total blood loss.

17  
18 Figure 3. Forest plot comparing the efficacy of intravenous versus topical TXA on postoperative  
19 hemoglobin levels.

20  
21  
22 Figure 4. Forest plot comparing the efficacy of intravenous versus topical TXA on postoperative  
23 transfusion rate.

24  
25  
26 Figure 5. Forest plot comparing the safety of intravenous versus topical TXA on postoperative venous  
27 thromboembolism.

28  
29  
30 Figure 6. Forest plot comparing the efficacy of single versus combined routes of TXA on total blood  
31 loss.

32  
33  
34 Figure 7. Forest plot comparing the efficacy of single versus combined routes of TXA on blood  
35 transfusion rate.

36  
37  
38 Figure 8. Forest plot comparing the safety of single versus combined routes of on postoperative venous  
39 thromboembolism.

1  
2  
3  
4  
5  
6  
7  
8  
9  
10  
11  
12  
13  
14  
15  
16  
17  
18  
19  
20  
21  
22  
23  
24  
25  
26  
27  
28  
29  
30  
31  
32  
33  
34  
35  
36  
37  
38  
39  
40  
41  
42  
43  
44  
45  
46  
47  
48  
49  
50  
51  
52  
53  
54  
55  
56  
57  
58  
59  
60

For peer review only

Table 1. Characteristics of prospective studies comparing topical with intravenous tranexamic acid in patients receiving total knee or hip arthroplasty.

| Author (year)          | Sample size | Region | Mean age (years) | Female, % | Surgery         | IV regimen | Topical regimen | Transfusion threshold                                                                                    | Tourniquet use | TP         | Jad score |
|------------------------|-------------|--------|------------------|-----------|-----------------|------------|-----------------|----------------------------------------------------------------------------------------------------------|----------------|------------|-----------|
| Maniar et al. (2012)   | 80          | India  | 67               | 80        | Unilateral TKA  | 10mg/kg    | 3g              | Hb< 8.5 g/dL without CHD, Hb< 10 g/dL with CHD, anemic symptoms, organ dysfunction                       | Yes            | LMWH       | 5         |
| Lee et al. (2013)      | 100         | Korea  | 67               | 89        | Unilateral TKA  | 1.5g       | 1.5g            | Hb< 8 g/dL, anemic symptoms/organ dysfunction when Hb< 10g/dL                                            | Yes            | NA         | 2         |
| Wang et al. (2014)     | 89          | USA    | 65               | 74        | Unilateral TKA  | 10mg/kg    | 2g              | Hb< 8 g/dL with anemic symptoms                                                                          | Yes            | LMWH       | 5         |
| Sarzaem et al. (2014)  | 100         | Iran   | 68               | 86        | Unilateral TKA  | 0.5g       | 3g              | Hb< 8 g/dL, anemic symptoms/organ dysfunction when Hb< 10g/dL                                            | Yes            | NA         | 3         |
| Barrena et al. (2014)  | 78          | Spain  | 71               | 65        | Unilateral THA  | 15mg/kg*2  | 3g              | Hb< 8 g/dL, anemic symptoms/organ dysfunction when Hb< 10g/dL                                            | Yes            | Enoxaparin | 5         |
| Chen et al. (2014)     | 40          | India  | 69               | 73        | Unspecified TKA | 10mg/kg*3  | 3g              | Hb< 8 g/dL                                                                                               | Yes            | LMWH       | 2         |
| Veret et al. (2014)    | 203         | China  | 62               | 64        | THA             | 3g         | 3g              | Hb< 9 g/dL                                                                                               | -              | LMWH       | 5         |
| Aguilera et al. (2015) | 100         | Spain  | 73               | 70        | Primary TKA     | 2g         | 1g              | Hb< 8 g/dL, Hb< 8.5 g/dL with CHD or over 70 years, Hb< 9 g/dL with anemic symptoms or organ dysfunction | Yes            | LMWH       | 3         |
| Geza et al. (2015)     | 60          | Greece | 71               | 85        | Unilateral TKA  | 15mg/kg    | 2g              | Hb< 8.5 g/dL without CHD, Hb< 9.5 g/dL with CHD, anemic symptoms, organ dysfunction                      | Yes            | Tinzaparin | 3         |

|    |                            |     |           |    |    |                |                     |         |                                                                   |     |                                                   |   |
|----|----------------------------|-----|-----------|----|----|----------------|---------------------|---------|-------------------------------------------------------------------|-----|---------------------------------------------------|---|
| 1  |                            |     |           |    |    |                |                     |         |                                                                   |     |                                                   |   |
| 2  |                            |     |           |    |    |                |                     |         |                                                                   |     |                                                   |   |
| 3  | ztas et al. (2015)         | 60  | Turkey    | 68 | 85 | Unilateral TKA | 15mg/kg<br>+10mg/kg | 2g      | Hb< 8 g/dL, anemic symptoms/<br>organ dysfunction when Hb< 10g/dL | Yes | Enoxapa<br>rin                                    | 3 |
| 4  |                            |     |           |    |    |                |                     |         |                                                                   |     |                                                   |   |
| 5  |                            |     |           |    |    |                |                     |         |                                                                   |     |                                                   |   |
| 6  | Zotzairis et al.<br>(2016) | 80  | Greece    | 69 | 80 | Unilateral TKA | 1g                  | 1g      | Hb< 10 g/dL, anemic symptoms/<br>organ dysfunction                | No  | LMWH                                              | 3 |
| 7  |                            |     |           |    |    |                |                     |         |                                                                   |     |                                                   |   |
| 8  |                            |     |           |    |    |                |                     |         |                                                                   |     |                                                   |   |
| 9  |                            |     |           |    |    |                |                     |         |                                                                   |     |                                                   |   |
| 10 |                            |     |           |    |    |                |                     |         |                                                                   |     |                                                   |   |
| 11 | orth et al. (2016)         | 139 | USA       | 65 | 23 | Unilateral THA | 2g                  | 2g      | Hb<7 g/dL, symptomatic anemia<br>and Hb<8 g/dL                    | -   | Enoxapa<br>rin,<br>rivaroxa<br>ban, or<br>aspirin | 5 |
| 12 |                            |     |           |    |    |                |                     |         |                                                                   |     |                                                   |   |
| 13 |                            |     |           |    |    |                |                     |         |                                                                   |     |                                                   |   |
| 14 |                            |     |           |    |    |                |                     |         |                                                                   |     |                                                   |   |
| 15 |                            |     |           |    |    |                |                     |         |                                                                   |     |                                                   |   |
| 16 | Uurlu et al.<br>(2016)     | 82  | Turkey    | 70 | 76 | Unilateral TKA | 20mg/kg             | 3g      | Hb<8 g/dL                                                         | Yes | enoxapa<br>rin                                    | 3 |
| 17 |                            |     |           |    |    |                |                     |         |                                                                   |     |                                                   |   |
| 18 |                            |     |           |    |    |                |                     |         |                                                                   |     |                                                   |   |
| 19 | ang et al. (2016)          | 50  | China     | 44 | 46 | Unilateral THA | 1g                  | 1g      | Hb<8 g/dL, symptomatic anemia<br>and Hb< 10 g/dL                  | -   | LMWH                                              | 3 |
| 20 |                            |     |           |    |    |                |                     |         |                                                                   |     |                                                   |   |
| 21 |                            |     |           |    |    |                |                     |         |                                                                   |     |                                                   |   |
| 22 |                            |     |           |    |    |                |                     |         |                                                                   |     |                                                   |   |
| 23 |                            |     |           |    |    |                |                     |         |                                                                   |     |                                                   |   |
| 24 | lay et al. (2016)          | 131 | USA       | 64 | 78 | Unilateral TKA | 2g                  | 2g      | Hb<7 g/dL, symptomatic anemia<br>and Hb<10 g/dL                   | Yes | LMWH<br>or oral<br>Xa<br>inhibitor                | 5 |
| 25 |                            |     |           |    |    |                |                     |         |                                                                   |     |                                                   |   |
| 26 |                            |     |           |    |    |                |                     |         |                                                                   |     |                                                   |   |
| 27 |                            |     |           |    |    |                |                     |         |                                                                   |     |                                                   |   |
| 28 | Keyhani et al.<br>(2016)   | 80  | Iran      | 68 | 39 | Unilateral TKA | 0.5g                | 3g      | Hb<8 g/dL                                                         | Yes | LMWH                                              | 2 |
| 29 |                            |     |           |    |    |                |                     |         |                                                                   |     |                                                   |   |
| 30 |                            |     |           |    |    |                |                     |         |                                                                   |     |                                                   |   |
| 31 |                            |     |           |    |    |                |                     |         |                                                                   |     |                                                   |   |
| 32 | Diosos et al.<br>(2016)    | 60  | Greece    | 70 | 80 | Unilateral TKA | 1g                  | 1g      | Hb< 10 g/dL, anemic symptoms/<br>organ dysfunction                | Yes | NA                                                | 2 |
| 33 |                            |     |           |    |    |                |                     |         |                                                                   |     |                                                   |   |
| 34 |                            |     |           |    |    |                |                     |         |                                                                   |     |                                                   |   |
| 35 | nen et al. (2016)          | 100 | Singapore | 65 | 75 | Unilateral TKA | 1.5g                | 1.5g    | Hb< 8 g/dL, anemic symptoms/<br>organ dysfunction when Hb< 10g/dL | Yes | LMWH                                              | 5 |
| 36 |                            |     |           |    |    |                |                     |         |                                                                   |     |                                                   |   |
| 37 |                            |     |           |    |    |                |                     |         |                                                                   |     |                                                   |   |
| 38 | Aggarwal et al.<br>(2016)  | 70  | India     | 57 | 36 | Bilateral TKA  | 15mg/kg             | 15mg/kg | Hb< 8 g/dL, Hct< 25%                                              | Yes | Aspirin                                           | 4 |
| 39 |                            |     |           |    |    |                |                     |         |                                                                   |     |                                                   |   |
| 40 |                            |     |           |    |    |                |                     |         |                                                                   |     |                                                   |   |
| 41 |                            |     |           |    |    |                |                     |         |                                                                   |     |                                                   |   |
| 42 |                            |     |           |    |    |                |                     |         |                                                                   |     |                                                   |   |
| 43 |                            |     |           |    |    |                |                     |         |                                                                   |     |                                                   |   |
| 44 |                            |     |           |    |    |                |                     |         |                                                                   |     |                                                   |   |
| 45 |                            |     |           |    |    |                |                     |         |                                                                   |     |                                                   |   |
| 46 |                            |     |           |    |    |                |                     |         |                                                                   |     |                                                   |   |
| 47 |                            |     |           |    |    |                |                     |         |                                                                   |     |                                                   |   |

1  
2  
3  
4  
5  
6  
7  
8  
9  
10  
11  
12  
13  
14  
15  
16  
17  
18  
19  
20  
21  
22  
23  
24  
25  
26  
27  
28  
29  
30  
31  
32  
33  
34  
35  
36  
37  
38  
39  
40  
41  
42  
43  
44  
45  
46  
47

|                  |     |       |    |    |     |      |    |                                                                   |    |                |   |
|------------------|-----|-------|----|----|-----|------|----|-------------------------------------------------------------------|----|----------------|---|
| ie et al. (2016) | 210 | China | 61 | 68 | THA | 1.5g | 3g | Hb< 7 g/dL, anemic symptoms/<br>organ dysfunction when Hb< 10g/dL | NA | Enoxapa<br>rin | 5 |
|------------------|-----|-------|----|----|-----|------|----|-------------------------------------------------------------------|----|----------------|---|

\* Hb, hemoglobin; Hct, hematocrit; IV, intravenous; LMWH, low molecular weight heparin; LOS, length of stay; MT, mechanical thromboprophylaxis; NA, not available; THA, total hip arthroplasty; TKA, total knee arthroplasty; TP, thromboembolism prophylaxis; TXA, tranexamic acid; VTE, venous thromboembolism.

For peer review only



Table 2. Characteristics of prospective studies comparing combination of topical and intravenous tranexamic acid with single tranexamic acid in patients receiving total knee or hip arthroplasty.

| Author (year)         | Sample size | Region  | Mean age | Female, % | Surgery        | Combination regimen                                                | Single regimen                                    | Transfusion threshold                                                    | Tourniquet use | TP          | Jada score |
|-----------------------|-------------|---------|----------|-----------|----------------|--------------------------------------------------------------------|---------------------------------------------------|--------------------------------------------------------------------------|----------------|-------------|------------|
| Huang et al. (2014)   | 184         | China   | 65       | 64        | Unilateral TKA | IV: 1.5g + topical: 1.5g                                           | IV: 3g                                            | Hb < 7 g/dL, anemic symptoms/ organ dysfunction when Hb < 10 g/dL        | Yes            | LMWH        | 5          |
| Lin et al. (2015)     | 120         | China   | 71       | 79        | Unilateral TKA | IV: 1g + topical: 1g                                               | topical: 1g                                       | Hb < 8 g/dL, anemic symptoms/ organ dysfunction when Hb < 9 g/dL         | Yes            | Rivaroxaban | 3          |
| Nielsen et al. (2016) | 60          | Denmark | 64       | 53        | Unilateral TKA | IV: 1g + topical: 3g                                               | IV: 1g                                            | Hb < 7.5 g/dL, Hb < 10 g/dL with CHD, anemic symptoms with Hb drop > 25% | No             | Rivaroxaban | 5          |
| Jain et al. (2016)    | 119         | India   | 69       | 63        | Unilateral TKA | IV: (15 mg/kg preoperative + 10mg/kg postoperative) + topical: 2 g | IV: 15 mg/kg preoperative + 10mg/kg postoperative | Hb < 7 g/dL, anemic symptoms/ organ dysfunction when Hb < 8 g/dL         | Yes            | Aspirin     | 3          |
| Zeng et al. (2016)    | 100         | China   | 53.4     | 47        | THA            | IV: 15 mg/kg + topical: 1 g                                        | IV: 15 mg/kg                                      | Hb < 7 g/dL, anemic symptoms/ organ dysfunction when Hb < 10g/dL         | NA             | Enoxaparin  | 5          |
| Xie et al. (2016)     | 210         | China   | 61       | 68        | THA            | IV: 1g + topical: 2g.                                              | IV: 1.5g, topical 3g                              | Hb < 7 g/dL, anemic symptoms/ organ dysfunction when Hb < 10g/dL         | NA             | Enoxaparin  | 5          |
| Wu et al. (2016)      | 84          | China   | 60       | 48        | THA            | IV: 15 mg/kg + topical: 3 g                                        | IV: 15 mg/kg                                      | Hb < 8 g/dL, anemic symptoms                                             | NA             | LMWH        | 3          |

\*Hb, hemoglobin; Hct, hematocrit; IV, intravenous; LMWH, low molecular weight heparin; LOS, length of stay; MT, mechanical thromboprophylaxis; NA, not

1  
2  
3 available; THA, total hip anthroplasty; TKA, total knee anthroplasty; TP, thromboembolism prophylaxis; TXA, tranexamic acid; VTE, venous  
4 thromboembolism.  
5  
6  
7  
8  
9  
10  
11  
12  
13  
14  
15  
16  
17  
18  
19  
20  
21  
22  
23  
24  
25  
26  
27  
28  
29  
30  
31  
32  
33  
34  
35  
36  
37  
38  
39  
40  
41  
42  
43  
44  
45  
46  
47

For peer review only

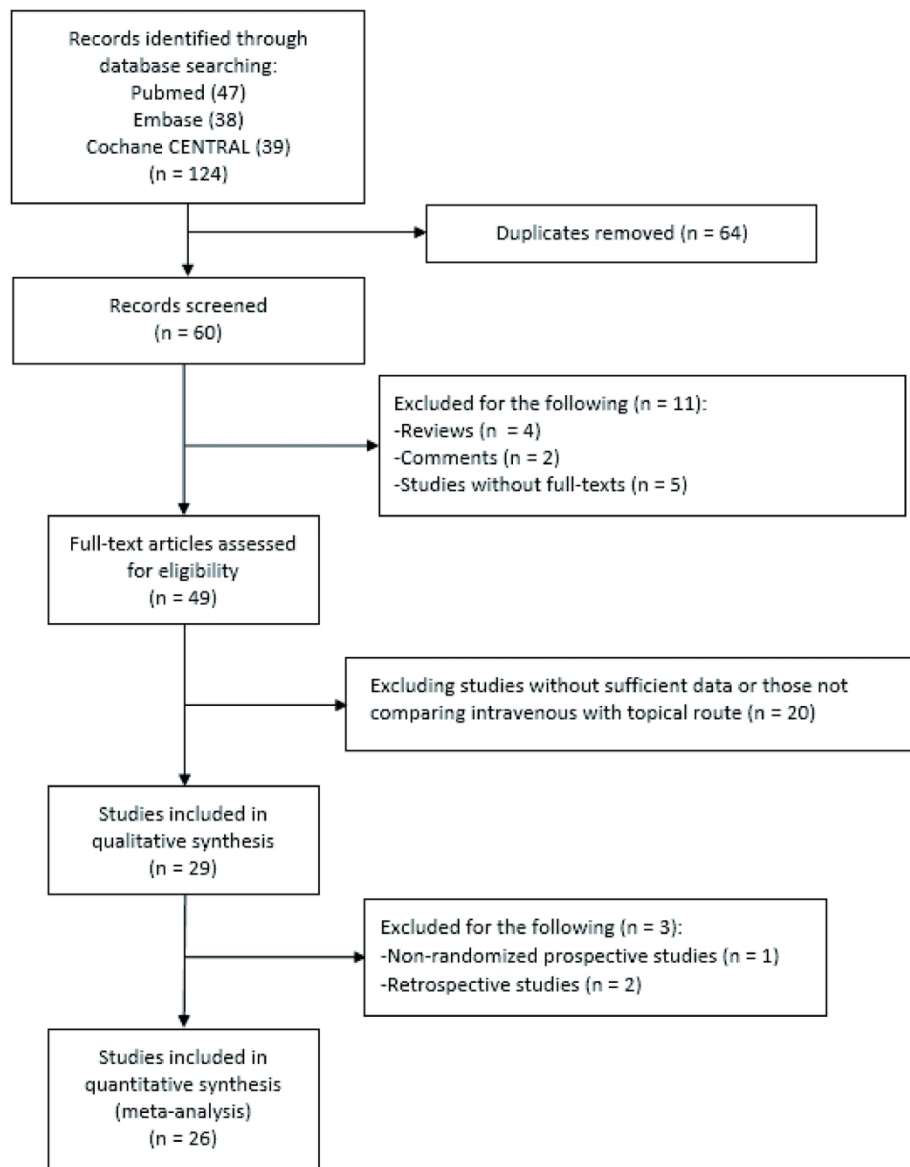

45 Figure 1. The flowdiagram showing the study selection process.

46 179x215mm (300 x 300 DPI)

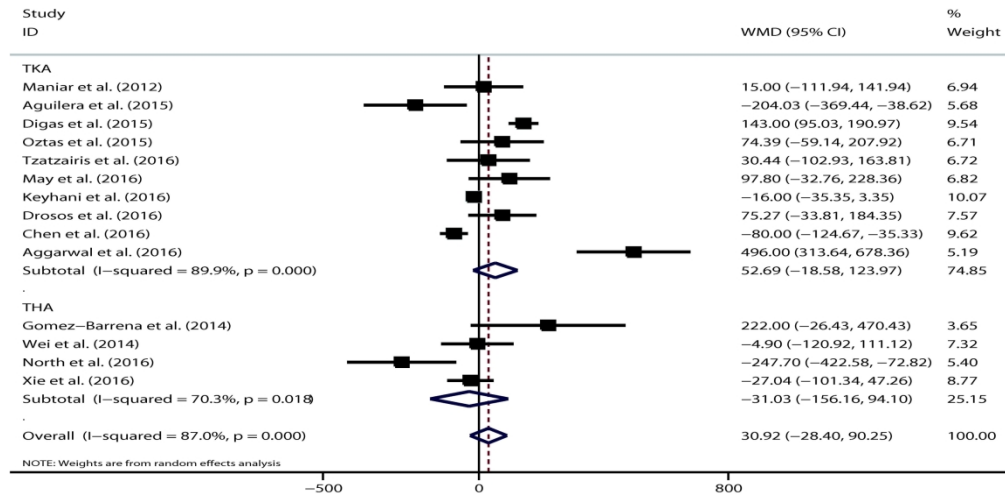

Figure 2. Forest plot comparing the efficacy of intravenous versus topical TXA on total blood loss.

228x114mm (300 x 300 DPI)

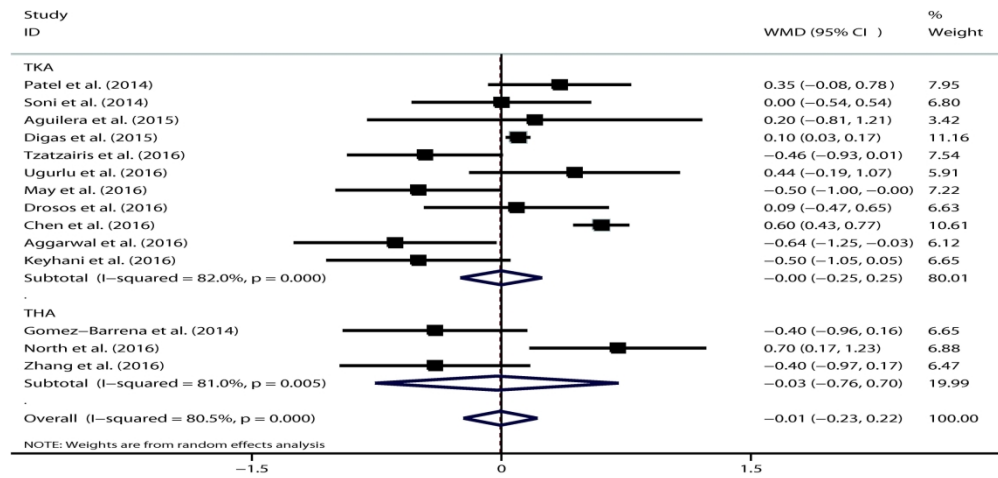

Figure 3. Forest plot comparing the efficacy of intravenous versus topical TXA on postoperative hemoglobin levels.

233x111mm (300 x 300 DPI)

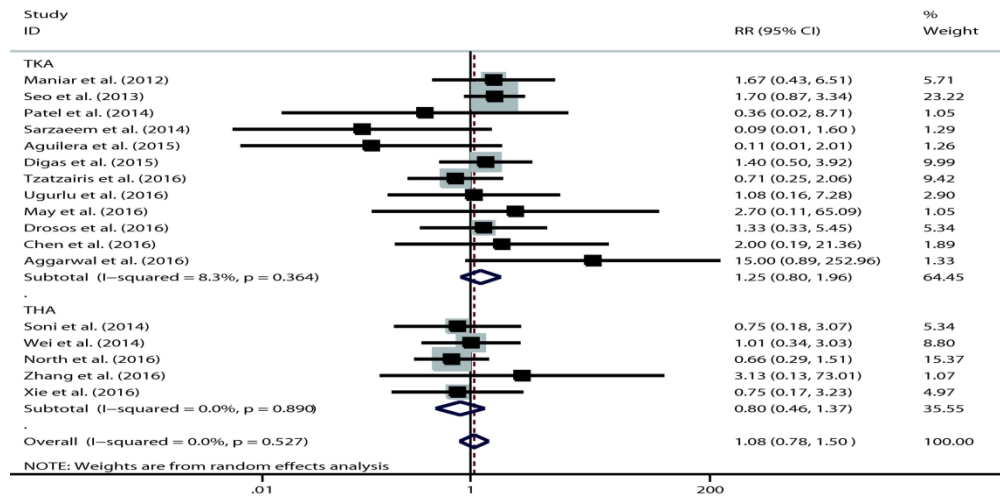

Figure 4. Forest plot comparing the efficacy of intravenous versus topical TXA on postoperative transfusion rate.

233x113mm (300 x 300 DPI)

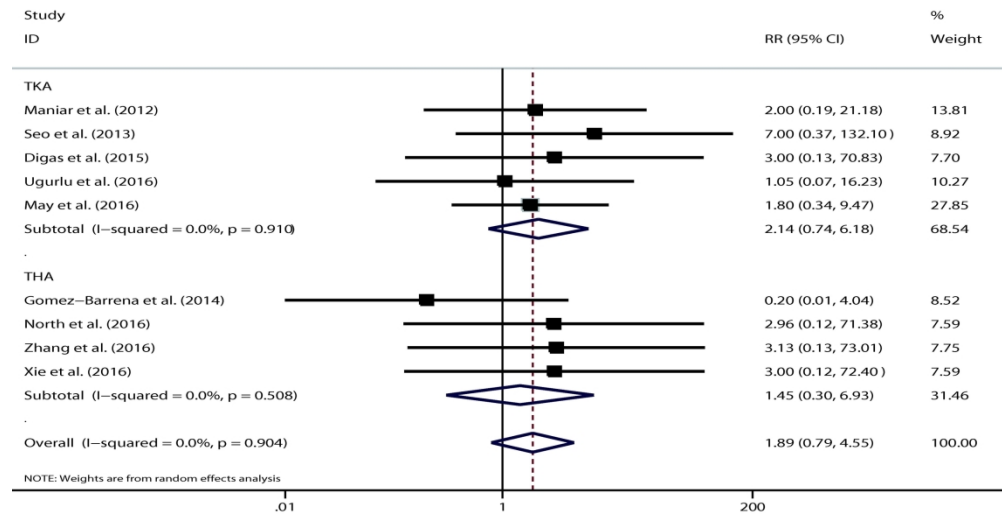

23 Figure 5. Forest plot comparing the safety of intravenous versus topical TXA on postoperative venous  
24 thromboembolism.

25 229x115mm (300 x 300 DPI)

26  
27  
28  
29  
30  
31  
32  
33  
34  
35  
36  
37  
38  
39  
40  
41  
42  
43  
44  
45  
46  
47  
48  
49  
50  
51  
52  
53  
54  
55  
56  
57  
58  
59  
60

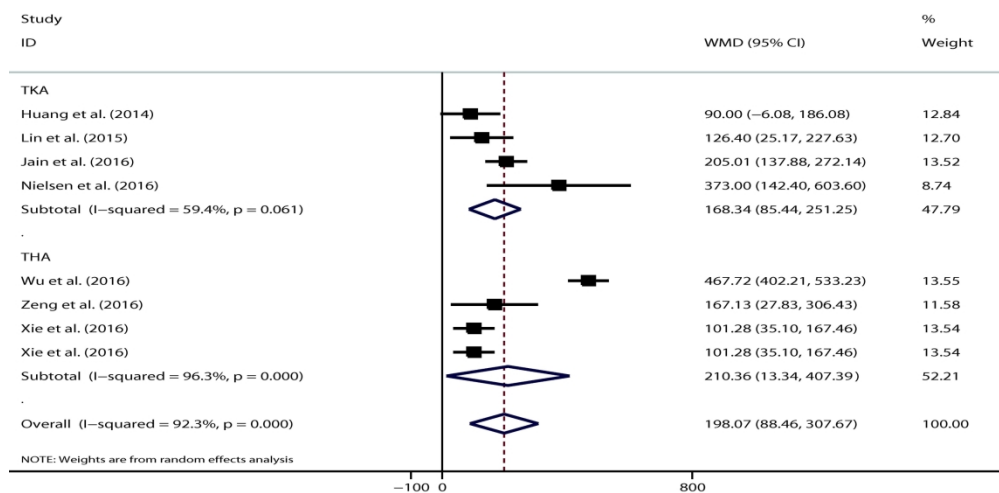

Figure 6. Forest plot comparing the efficacy of single versus combined routes of TXA on total blood loss.

234x112mm (300 x 300 DPI)



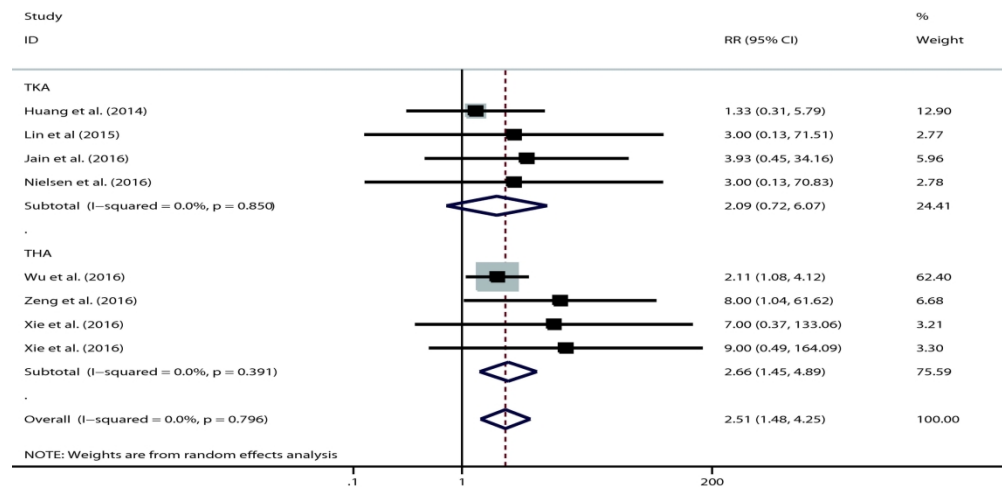

Figure 7. Forest plot comparing the efficacy of single versus combined routes of TXA on blood transfusion rate.

222x105mm (300 x 300 DPI)

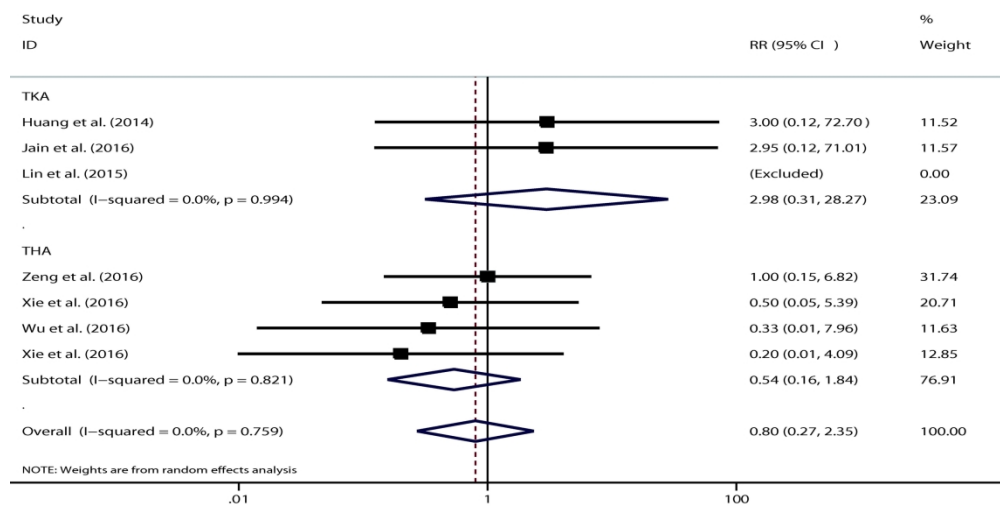

Figure 8. Forest plot comparing the safety of single versus combined routes of on postoperative venous thromboembolism.

234x115mm (300 x 300 DPI)

1  
2  
3  
4  
5  
6  
7  
8  
9  
10  
11  
12  
13  
14  
15  
16  
17  
18  
19  
20  
21  
22  
23  
24  
25  
26  
27  
28  
29  
30  
31  
32  
33  
34  
35  
36  
37  
38  
39  
40  
41  
42  
43  
44  
45  
46

**Supplemental Table 1. Quality assessment of studies by the Jadad scale.**

| Author (year)               | Randomization |             | Blinding  |             | Description of withdrawal and dropouts | Total score |
|-----------------------------|---------------|-------------|-----------|-------------|----------------------------------------|-------------|
|                             | Mentioned     | Appropriate | Mentioned | Appropriate |                                        |             |
| Maniar et al. (2012)        | 1             | 1           | 1         | 1           | 1                                      | 5           |
| Seo et al. (2013)           | 1             | 1           | 0         | 0           | 0                                      | 2           |
| Lin et al. (2015)           | 1             | 1           | 0         | 0           | 1                                      | 3           |
| Huang et al. (2014)         | 1             | 1           | 1         | 1           | 1                                      | 5           |
| Patel et al. (2014)         | 1             | 1           | 1         | 1           | 1                                      | 5           |
| Sarzaem et al. (2014)       | 1             | 1           | 1         | 0           | 0                                      | 3           |
| Gomez-Barrena et al. (2014) | 1             | 1           | 1         | 1           | 1                                      | 5           |
| Soni et al. (2014)          | 1             | 1           | 0         | 0           | 0                                      | 2           |
| Wei et al. (2014)           | 1             | 1           | 1         | 1           | 1                                      | 5           |
| Aguilera et al. (2015)      | 1             | 1           | 0         | 0           | 1                                      | 3           |
| Digas et al. (2015)         | 1             | 1           | 1         | 0           | 0                                      | 3           |
| Oztas et al. (2015)         | 1             | 0           | 0         | 0           | 0                                      | 1           |
| Tzatzairis et al. (2016)    | 1             | 1           | 0         | 0           | 1                                      | 3           |

|                        |   |   |   |   |   |   |
|------------------------|---|---|---|---|---|---|
| North et al. (2016)    | 1 | 1 | 1 | 1 | 1 | 5 |
| Ugurlu et al. (2016)   | 1 | 1 | 0 | 0 | 1 | 3 |
| Zhang et al. (2016)    | 1 | 1 | 0 | 0 | 1 | 3 |
| May et al. (2016)      | 1 | 1 | 1 | 1 | 1 | 5 |
| Keyhani et al.(2016)   | 1 | 0 | 0 | 0 | 1 | 2 |
| Drosos et al. (2016)   | 1 | 1 | 0 | 0 | 0 | 2 |
| Chen et al. (2016)     | 1 | 1 | 1 | 1 | 1 | 5 |
| Aggarwal et al. (2016) | 1 | 1 | 1 | 1 | 0 | 4 |
| Xie et al. (2016)      | 1 | 1 | 1 | 1 | 1 | 5 |
| Zeng et al. (2016)     | 1 | 1 | 1 | 1 | 1 | 5 |
| Jain et al. (2016)     | 1 | 1 | 0 | 0 | 1 | 3 |
| Nielsen et al. (2016)  | 1 | 1 | 1 | 1 | 1 | 5 |
| Wu et al. (2016)       | 1 | 1 | 0 | 0 | 1 | 3 |

## Search strategy in PubMed

- #1. "Arthroplasty, Replacement, Knee"[Mesh]
- #2. TKR
- #3. TKA
- #4. Total knee replacement
- #5. Total knee arthroplasty
- #6. #1-5/or
- #7. "Arthroplasty, Replacement, Hip"[Mesh]
- #8. THR
- #9. THA
- #10. Total hip replacement
- #11. Total hip arthroplasty
- #12. #7-11/or
- #13. Tranexamic acid
- #14. Randomized controlled trials
- #15. #6 and #12 and #13 and #14

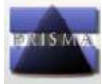

# PRISMA 2009 Checklist

| Section/topic                      | #  | Checklist item                                                                                                                                                                                                                                                                                              | Reported on page # |
|------------------------------------|----|-------------------------------------------------------------------------------------------------------------------------------------------------------------------------------------------------------------------------------------------------------------------------------------------------------------|--------------------|
| <b>TITLE</b>                       |    |                                                                                                                                                                                                                                                                                                             |                    |
| Title                              | 1  | Identify the report as a systematic review, meta-analysis, or both.                                                                                                                                                                                                                                         | 1                  |
| <b>ABSTRACT</b>                    |    |                                                                                                                                                                                                                                                                                                             |                    |
| Structured summary                 | 2  | Provide a structured summary including, as applicable: background; objectives; data sources; study eligibility criteria, participants, and interventions; study appraisal and synthesis methods; results; limitations; conclusions and implications of key findings; systematic review registration number. | 2                  |
| <b>INTRODUCTION</b>                |    |                                                                                                                                                                                                                                                                                                             |                    |
| Rationale                          | 3  | Describe the rationale for the review in the context of what is already known.                                                                                                                                                                                                                              | 3                  |
| Objectives                         | 4  | Provide an explicit statement of questions being addressed with reference to participants, interventions, comparisons, outcomes, and study design (PICOS).                                                                                                                                                  | 3                  |
| <b>METHODS</b>                     |    |                                                                                                                                                                                                                                                                                                             |                    |
| Protocol and registration          | 5  | Indicate if a review protocol exists, if and where it can be accessed (e.g., Web address), and, if available, provide registration information including registration number.                                                                                                                               |                    |
| Eligibility criteria               | 6  | Specify study characteristics (e.g., PICOS, length of follow-up) and report characteristics (e.g., years considered, language, publication status) used as criteria for eligibility, giving rationale.                                                                                                      | 4                  |
| Information sources                | 7  | Describe all information sources (e.g., databases with dates of coverage, contact with study authors to identify additional studies) in the search and date last searched.                                                                                                                                  | 4                  |
| Search                             | 8  | Present full electronic search strategy for at least one database, including any limits used, such that it could be repeated.                                                                                                                                                                               | 4                  |
| Study selection                    | 9  | State the process for selecting studies (i.e., screening, eligibility, included in systematic review, and, if applicable, included in the meta-analysis).                                                                                                                                                   | 4                  |
| Data collection process            | 10 | Describe method of data extraction from reports (e.g., piloted forms, independently, in duplicate) and any processes for obtaining and confirming data from investigators.                                                                                                                                  | 4                  |
| Data items                         | 11 | List and define all variables for which data were sought (e.g., PICOS, funding sources) and any assumptions and simplifications made.                                                                                                                                                                       | 4                  |
| Risk of bias in individual studies | 12 | Describe methods used for assessing risk of bias of individual studies (including specification of whether this was done at the study or outcome level), and how this information is to be used in any data synthesis.                                                                                      | 4                  |
| Summary measures                   | 13 | State the principal summary measures (e.g., risk ratio, difference in means).                                                                                                                                                                                                                               | 4                  |
| Synthesis of results               | 14 | Describe the methods of handling data and combining results of studies, if done, including measures of consistency (e.g., $I^2$ ) for each meta-analysis.                                                                                                                                                   | 4-5                |

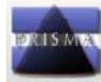

# PRISMA 2009 Checklist

| Section/topic                 | #  | Checklist item                                                                                                                                                                                           | Reported on page # |
|-------------------------------|----|----------------------------------------------------------------------------------------------------------------------------------------------------------------------------------------------------------|--------------------|
| Risk of bias across studies   | 15 | Specify any assessment of risk of bias that may affect the cumulative evidence (e.g., publication bias, selective reporting within studies).                                                             | 4-5                |
| Additional analyses           | 16 | Describe methods of additional analyses (e.g., sensitivity or subgroup analyses, meta-regression), if done, indicating which were pre-specified.                                                         | 4-5                |
| <b>RESULTS</b>                |    |                                                                                                                                                                                                          |                    |
| Study selection               | 17 | Give numbers of studies screened, assessed for eligibility, and included in the review, with reasons for exclusions at each stage, ideally with a flow diagram.                                          | 5                  |
| Study characteristics         | 18 | For each study, present characteristics for which data were extracted (e.g., study size, PICOS, follow-up period) and provide the citations.                                                             | 5                  |
| Risk of bias within studies   | 19 | Present data on risk of bias of each study and, if available, any outcome level assessment (see item 12).                                                                                                | 5                  |
| Results of individual studies | 20 | For all outcomes considered (benefits or harms), present, for each study: (a) simple summary data for each intervention group (b) effect estimates and confidence intervals, ideally with a forest plot. | 5,6,7,8            |
| Synthesis of results          | 21 | Present results of each meta-analysis done, including confidence intervals and measures of consistency.                                                                                                  | 5,6,7,8            |
| Risk of bias across studies   | 22 | Present results of any assessment of risk of bias across studies (see Item 15).                                                                                                                          | 5,6,7,8            |
| Additional analysis           | 23 | Give results of additional analyses, if done (e.g., sensitivity or subgroup analyses, meta-regression [see Item 16]).                                                                                    | 5,6,7,8            |
| <b>DISCUSSION</b>             |    |                                                                                                                                                                                                          |                    |
| Summary of evidence           | 24 | Summarize the main findings including the strength of evidence for each main outcome; consider their relevance to key groups (e.g., healthcare providers, users, and policy makers).                     | 8,9,10             |
| Limitations                   | 25 | Discuss limitations at study and outcome level (e.g., risk of bias), and at review-level (e.g., incomplete retrieval of identified research, reporting bias).                                            | 10                 |
| Conclusions                   | 26 | Provide a general interpretation of the results in the context of other evidence, and implications for future research.                                                                                  | 10                 |
| <b>FUNDING</b>                |    |                                                                                                                                                                                                          |                    |
| Funding                       | 27 | Describe sources of funding for the systematic review and other support (e.g., supply of data); role of funders for the systematic review.                                                               | 11                 |

From: Moher D, Liberati A, Tetzlaff J, Altman DG, The PRISMA Group (2009). Preferred Reporting Items for Systematic Reviews and Meta-Analyses: The PRISMA Statement. PLoS Med 6(6): e1000097. doi:10.1371/journal.pmed1000097

For more information, visit: [www.prisma-statement.org](http://www.prisma-statement.org).
