# Supplementary material for: Comparison of intravenous, topical or combined routes of tranexamic acid administration in patients undergoing total knee and hip arthroplasty: a meta-analysis of randomised controlled trials
Source: PubMed Central journal article supplement — BMJ Open. 2019 Jan 28;9(1):e024350. doi: 10.1136/bmjopen-2018-024350 (PMC6352808; doi:10.1136/bmjopen-2018-024350), 2019-01-28
Supplement: bmjopen-2018-024350supp001.pdf [file bmjopen-2018-024350supp001.pdf]

## **Search strategy in PubMed**

- #1. "Arthroplasty, Replacement, Knee"[Mesh]
- #2. TKR
- #3. TKA
- #4. Total knee replacement
- #5. Total knee arthroplasty
- #6. #1-5/or
- #7. "Arthroplasty, Replacement, Hip"[Mesh]
- #8. THR
- #9. THA
- #10. Total hip replacement
- #11. Total hip arthroplasty
- #12. #7-11/or
- #13. Tranexamic acid
- #14. Randomized controlled trials
- #15. #6 and #12 and #13 and #14
