# Supplementary material for: Comparison of intravenous, topical or combined routes of tranexamic acid administration in patients undergoing total knee and hip arthroplasty: a meta-analysis of randomised controlled trials
Source: PubMed Central journal article supplement — BMJ Open. 2019 Jan 28;9(1):e024350. doi: 10.1136/bmjopen-2018-024350 (PMC6352808; doi:10.1136/bmjopen-2018-024350), 2019-01-28
Supplement: bmjopen-2018-024350supp002.pdf [file bmjopen-2018-024350supp002.pdf]

**Supplemental Table 1. Quality assessment of studies by the Jadad scale.**

| Author (year)               | Randomization |             | Blinding  |             | Description of withdrawal and dropouts | Total score |
|-----------------------------|---------------|-------------|-----------|-------------|----------------------------------------|-------------|
|                             | Mentioned     | Appropriate | Mentioned | Appropriate |                                        |             |
| Maniar et al. (2012)        | 1             | 1           | 1         | 1           | 1                                      | 5           |
| Seo et al. (2013)           | 1             | 1           | 0         | 0           | 0                                      | 2           |
| Lin et al. (2015)           | 1             | 1           | 0         | 0           | 1                                      | 3           |
| Huang et al. (2014)         | 1             | 1           | 1         | 1           | 1                                      | 5           |
| Patel et al. (2014)         | 1             | 1           | 1         | 1           | 1                                      | 5           |
| Sarzaem et al. (2014)       | 1             | 1           | 1         | 0           | 0                                      | 3           |
| Gomez-Barrena et al. (2014) | 1             | 1           | 1         | 1           | 1                                      | 5           |
| Soni et al. (2014)          | 1             | 1           | 0         | 0           | 0                                      | 2           |
| Wei et al. (2014)           | 1             | 1           | 1         | 1           | 1                                      | 5           |
| Aguilera et al. (2015)      | 1             | 1           | 0         | 0           | 1                                      | 3           |
| Digas et al. (2015)         | 1             | 1           | 1         | 0           | 0                                      | 3           |
| Oztas et al. (2015)         | 1             | 0           | 0         | 0           | 0                                      | 1           |
| Tzatzairis et al. (2016)    | 1             | 1           | 0         | 0           | 1                                      | 3           |

|                        |   |   |   |   |   |   |
|------------------------|---|---|---|---|---|---|
| North et al. (2016)    | 1 | 1 | 1 | 1 | 1 | 5 |
| Ugurlu et al. (2016)   | 1 | 1 | 0 | 0 | 1 | 3 |
| Zhang et al. (2016)    | 1 | 1 | 0 | 0 | 1 | 3 |
| May et al. (2016)      | 1 | 1 | 1 | 1 | 1 | 5 |
| Keyhani et al.(2016)   | 1 | 0 | 0 | 0 | 1 | 2 |
| Drosos et al. (2016)   | 1 | 1 | 0 | 0 | 0 | 2 |
| Chen et al. (2016)     | 1 | 1 | 1 | 1 | 1 | 5 |
| Aggarwal et al. (2016) | 1 | 1 | 1 | 1 | 0 | 4 |
| Xie et al. (2016)      | 1 | 1 | 1 | 1 | 1 | 5 |
| Zeng et al. (2016)     | 1 | 1 | 1 | 1 | 1 | 5 |
| Jain et al. (2016)     | 1 | 1 | 0 | 0 | 1 | 3 |
| Nielsen et al. (2016)  | 1 | 1 | 1 | 1 | 1 | 5 |
| Wu et al. (2016)       | 1 | 1 | 0 | 0 | 1 | 3 |
